# Supplementary material for: Transcriptomic profile of cystic fibrosis patients identifies type I interferon response and ribosomal stalk proteins as potential modifiers of disease severity
Source: PubMed Central journal article supplement (PMC5573219; doi:10.1371/journal.pone.0183526), 2017-08-28
Supplement: pone.0183526.s004.pdf [file pone.0183526.s004.pdf]

**Supplementary Table 1**

| Genes                   | LogFC      | LogCPM     | P Value     | FDR         | Group                           |
|-------------------------|------------|------------|-------------|-------------|---------------------------------|
| <a href="#">EGR1</a>    | 4,75685917 | 5,23654823 | 4,97296E-10 | 3,17722E-06 | Over<br>expressed in<br>Mild CF |
| <a href="#">SFRP1</a>   | 4,56050125 | 0,01399744 | 6,67709E-06 | 0,00426599  |                                 |
| <a href="#">RSAD2</a>   | 4,24302736 | 8,07492536 | 2,95443E-08 | 0,000125839 |                                 |
| <a href="#">FOSB</a>    | 3,64111933 | 3,92832731 | 7,47804E-08 | 0,000191109 |                                 |
| <a href="#">IFIT1</a>   | 3,46202883 | 7,97475009 | 5,77677E-08 | 0,000184539 |                                 |
| <a href="#">IFI44L</a>  | 3,4414187  | 6,91855957 | 1,77351E-07 | 0,000241628 |                                 |
| <a href="#">IL8</a>     | 3,27771097 | 4,65098567 | 8,6626E-11  | 1,10691E-06 |                                 |
| <a href="#">G0S2</a>    | 3,18564445 | 4,04214147 | 1,85408E-05 | 0,008461214 |                                 |
| <a href="#">OTOF</a>    | 3,11220905 | 1,82287055 | 9,60712E-05 | 0,024920001 |                                 |
| <a href="#">CXCL10</a>  | 3,06140183 | 2,2102772  | 2,33046E-06 | 0,001969486 |                                 |
| <a href="#">IFI44</a>   | 3,0136557  | 6,57421713 | 1,60928E-07 | 0,000241628 |                                 |
| <a href="#">ISG15</a>   | 2,87741886 | 6,96415024 | 4,89784E-06 | 0,003293926 |                                 |
| <a href="#">CMPK2</a>   | 2,73073419 | 5,9613396  | 1,85287E-06 | 0,001691141 |                                 |
| <a href="#">EGR3</a>    | 2,65348939 | 2,135929   | 7,71508E-05 | 0,021907392 |                                 |
| <a href="#">LAMP3</a>   | 2,6530355  | 3,09078531 | 8,09393E-05 | 0,022483539 |                                 |
| <a href="#">HERC5</a>   | 2,62284335 | 6,91854226 | 2,4661E-06  | 0,001969486 |                                 |
| <a href="#">IFIT3</a>   | 2,61640412 | 8,83331063 | 9,90497E-07 | 0,001054714 |                                 |
| <a href="#">OAS3</a>    | 2,47121912 | 8,11048018 | 1,26507E-05 | 0,00646604  |                                 |
| <a href="#">SIGLEC1</a> | 2,4661411  | 5,05708989 | 3,02927E-05 | 0,012486459 |                                 |
| <a href="#">EGR2</a>    | 2,4117919  | 1,17992739 | 0,000244112 | 0,040389143 |                                 |
| <a href="#">SMTNL1</a>  | 2,36581672 | 2,42278185 | 0,000248532 | 0,040389143 |                                 |
| <a href="#">USP18</a>   | 2,30775931 | 2,2778699  | 0,000107015 | 0,025800772 |                                 |
| <a href="#">ABO</a>     | 2,21426041 | 0,2243331  | 0,000267484 | 0,042196447 |                                 |
| <a href="#">IFIT2</a>   | 2,19282706 | 9,3285642  | 1,37918E-06 | 0,001355631 |                                 |
| <a href="#">IFI6</a>    | 2,17676155 | 7,11215417 | 2,22774E-05 | 0,009488674 |                                 |
| <a href="#">SEPT4</a>   | 2,12672281 | 2,41362464 | 4,97384E-05 | 0,017654364 |                                 |
| <a href="#">FOS</a>     | 2,11147897 | 8,34845726 | 4,04103E-07 | 0,000469421 |                                 |
| <a href="#">MX1</a>     | 1,9826741  | 8,34885163 | 6,24467E-05 | 0,0199486   |                                 |
| <a href="#">ABCA13</a>  | 1,95588032 | 1,38590224 | 0,000324446 | 0,048206653 |                                 |
| <a href="#">PTGS2</a>   | 1,85933601 | 6,3563357  | 9,49467E-08 | 0,000202205 |                                 |
| <a href="#">OASL</a>    | 1,71121639 | 6,62487045 | 0,000319695 | 0,048059545 |                                 |
| <a href="#">TPST1</a>   | 1,64027026 | 3,83869717 | 4,07609E-05 | 0,015318915 |                                 |
| <a href="#">IFIT5</a>   | 1,60137965 | 6,37263397 | 1,44456E-05 | 0,007099476 |                                 |
| <a href="#">RTP4</a>    | 1,49459643 | 3,96403254 | 0,000191988 | 0,035282226 |                                 |
| <a href="#">CLEC9A</a>  | 1,40548726 | 1,54654361 | 6,01134E-05 | 0,0199486   |                                 |
| <a href="#">ZNF684</a>  | 1,36099526 | 2,2156351  | 4,03996E-05 | 0,015318915 |                                 |
| <a href="#">ZNF117</a>  | 1,33292188 | 6,09348048 | 1,03182E-05 | 0,005493602 |                                 |
| <a href="#">RPL34</a>   | 1,30503652 | 5,34525252 | 0,000334494 | 0,049128323 |                                 |
| <a href="#">MS4A3</a>   | 1,29447171 | 3,23110638 | 2,00011E-05 | 0,008812894 |                                 |
| <a href="#">KY</a>      | 1,2894184  | 2,31204488 | 1,89097E-07 | 0,000241628 |                                 |
| <a href="#">ZBP1</a>    | 1,26130826 | 6,12112739 | 5,66385E-05 | 0,019560187 |                                 |
| <a href="#">CD69</a>    | 1,23796122 | 3,53302714 | 7,08259E-06 | 0,004309587 |                                 |
| <a href="#">SAMD9</a>   | 1,22328594 | 7,64574166 | 0,000232886 | 0,039258933 |                                 |
| <a href="#">DUSP1</a>   | 1,20786257 | 8,83410518 | 0,000159095 | 0,032268471 |                                 |
| <a href="#">CHMP5</a>   | 1,16958162 | 5,58240199 | 0,000116703 | 0,027113313 |                                 |
| <a href="#">RPL31</a>   | 1,1579116  | 6,23542853 | 0,000233501 | 0,039258933 |                                 |

| Genes                     | LogFC       | LogCPM     | P Value     | FDR         | Group                     |
|---------------------------|-------------|------------|-------------|-------------|---------------------------|
| <a href="#">FAM26F</a>    | 1,10947521  | 4,18884117 | 0,00011951  | 0,027127414 | Over expressed in Mild CF |
| <a href="#">CETN3</a>     | 1,10115548  | 1,81181475 | 0,000314653 | 0,047864734 |                           |
| <a href="#">RPS24</a>     | 1,08438978  | 6,2394819  | 0,000285286 | 0,044455846 |                           |
| <a href="#">CLEC2B</a>    | 1,07854663  | 5,59553273 | 0,000135647 | 0,028888203 |                           |
| <a href="#">POLR2K</a>    | 1,03727835  | 3,47452811 | 0,000122313 | 0,027127414 |                           |
| <a href="#">PMAIP1</a>    | 1,00954679  | 3,6666252  | 2,63467E-06 | 0,001980341 |                           |
| <a href="#">TMEM123</a>   | 0,93000559  | 8,94088988 | 0,000123133 | 0,027127414 |                           |
| <a href="#">B2M</a>       | 0,89334493  | 13,2121243 | 0,000342112 | 0,049676182 |                           |
| <a href="#">SPAG1</a>     | 0,86941069  | 3,13717339 | 8,42148E-05 | 0,02283827  |                           |
| <a href="#">MRPL47</a>    | 0,86526561  | 3,30066822 | 0,00021638  | 0,038401404 |                           |
| <a href="#">LOC338758</a> | 0,85338339  | 2,15060865 | 0,000195152 | 0,035282226 |                           |
| <a href="#">ARRDC3</a>    | 0,85271369  | 8,16823747 | 1,8379E-05  | 0,008461214 |                           |
| <a href="#">DDIT3</a>     | 0,8164075   | 4,23864419 | 4,28511E-05 | 0,015644306 |                           |
| <a href="#">TPRKB</a>     | 0,80427373  | 2,7553625  | 0,000192612 | 0,035282226 |                           |
| <a href="#">HCG27</a>     | 0,7843849   | 6,51997721 | 3,40117E-05 | 0,013581308 |                           |
| <a href="#">ZNF92</a>     | 0,76976199  | 3,9322455  | 0,000182428 | 0,035282226 |                           |
| <a href="#">NDUFA5</a>    | 0,76933422  | 3,73290386 | 0,000178876 | 0,035282226 |                           |
| <a href="#">SCLT1</a>     | 0,76648461  | 4,99439004 | 9,92168E-05 | 0,024920001 |                           |
| <a href="#">SASS6</a>     | 0,76501924  | 2,74584052 | 6,16935E-05 | 0,0199486   |                           |
| <a href="#">ABHD3</a>     | 0,76321014  | 6,47161195 | 0,00014531  | 0,029947853 |                           |
| <a href="#">ZNF708</a>    | 0,76077654  | 3,82218108 | 0,00014056  | 0,029443841 |                           |
| <a href="#">FGL2</a>      | 0,73232659  | 10,0327795 | 0,000223373 | 0,039099522 |                           |
| <a href="#">ATP6V1G1</a>  | 0,73071843  | 6,60372699 | 7,6332E-05  | 0,021907392 |                           |
| <a href="#">SBDSP1</a>    | 0,70752957  | 3,18967094 | 0,000129578 | 0,028063456 |                           |
| <a href="#">MBIP</a>      | 0,66055476  | 3,13297421 | 0,000101412 | 0,024920001 |                           |
| <a href="#">MALAT1</a>    | 0,64068412  | 9,17379658 | 9,96884E-05 | 0,024920001 |                           |
| <a href="#">ZNF136</a>    | 0,54956276  | 3,82950058 | 0,000193051 | 0,035282226 |                           |
| <a href="#">COA1</a>      | 0,54062677  | 4,75695263 | 0,000314005 | 0,047864734 |                           |
| <a href="#">CRTC3</a>     | -0,46378978 | 6,2799412  | 7,57566E-05 | 0,021907392 |                           |
| <a href="#">PLD2</a>      | -0,52832926 | 4,51268889 | 0,000179533 | 0,035282226 |                           |
| <a href="#">POU2F2</a>    | -0,56166486 | 7,05797144 | 0,00023262  | 0,039258933 |                           |
| <a href="#">ADORA2A</a>   | -0,56418647 | 5,81254057 | 6,76041E-05 | 0,021069404 |                           |
| <a href="#">SSBP3</a>     | -0,56746822 | 4,76010263 | 0,000196043 | 0,035282226 |                           |
| <a href="#">CDK5RAP2</a>  | -0,7402793  | 6,01407434 | 7,37192E-05 | 0,021907392 |                           |
| <a href="#">AEBP1</a>     | -1,0241242  | 3,52520657 | 0,000113444 | 0,026844276 |                           |
| <a href="#">PTGFRN</a>    | -1,12029499 | 1,44657919 | 8,5791E-05  | 0,02283827  |                           |
| <a href="#">HSD3B7</a>    | -1,17987244 | 2,5789736  | 0,000249706 | 0,040389143 |                           |
| <a href="#">ZNF683</a>    | -1,52672894 | 3,52591536 | 1,45732E-07 | 0,000241628 |                           |
| <a href="#">C4BPA</a>     | -3,02639426 | 3,4706908  | 3,17421E-06 | 0,002253333 |                           |
| <a href="#">AP3B2</a>     | -3,15160686 | 1,69603618 | 9,72666E-06 | 0,005403796 |                           |
| <a href="#">LOC644172</a> | -4,01662914 | 0,55410415 | 8,16245E-06 | 0,004740899 |                           |
| <a href="#">EPB41L4B</a>  | -4,50678292 | 0,52592381 | 0,000260297 | 0,041575945 |                           |

Log FC      Log of Fold Cange  
Log CPM     Log of Count Per Million  
FDR          False Discovery Rate
