# Supplementary material for: Transcriptomic profile of cystic fibrosis patients identifies type I interferon response and ribosomal stalk proteins as potential modifiers of disease severity
Source: PubMed Central journal article supplement (PMC5573219; doi:10.1371/journal.pone.0183526), 2017-08-28
Supplement: pone.0183526.s005.pdf [file pone.0183526.s005.pdf]

**Supplementary Table 2**

| <b>GO ID</b> | <b>Term</b>                            | <b>Total No. Genes</b> | <b>Enriched Genes</b> | <b>% (Fold Enrichment)</b> | <b>P-value</b> |
|--------------|----------------------------------------|------------------------|-----------------------|----------------------------|----------------|
| GO:0060337   | Type I interferon Response             | 63                     | 10                    | 38.71                      | 1.45E-09       |
| GO:0051607   | defense response to virus              | 169                    | 13                    | 19.76                      | 2.56E-09       |
| GO:0002252   | immune effector process                | 532                    | 16                    | 7.33                       | 4.42E-06       |
| GO:0006950   | response to stress                     | 761                    | 17                    | 5.45                       | 9.99E-05       |
| GO:0045047   | Protein targetting to ER               | 90                     | 4                     | 5.30                       | 1.89E-05       |
| GO:0043207   | response to external biotic stimulus   | 876                    | 19                    | 5.29                       | 1.93E-05       |
| GO:0071345   | cellular response to cytokine stimulus | 652                    | 14                    | 5.24                       | 3.65E-03       |
| GO:0006952   | defense response                       | 1262                   | 25                    | 4.83                       | 2.11E-07       |
| GO:0006955   | immune response                        | 1169                   | 20                    | 4.17                       | 3.58E-04       |
| GO:0009605   | response to external stimulus          | 1911                   | 26                    | 3.32                       | 2.24E-04       |
| GO:0002376   | immune system process                  | 2106                   | 28                    | 3.24                       | 8.85E-05       |
