# Supplementary material for: Transcriptomic profile of cystic fibrosis patients identifies type I interferon response and ribosomal stalk proteins as potential modifiers of disease severity
Source: PubMed Central journal article supplement (PMC5573219; doi:10.1371/journal.pone.0183526), 2017-08-28
Supplement: pone.0183526.s006.pdf [file pone.0183526.s006.pdf]

**ISMARA****Project****Final-1****Navigation**

[All motifs sorted by activity significance](#)

[All samples sorted alphabetically](#)

[Mean activities](#)

**Downloads**

[Activities table](#)

[Activity deltas table](#)

[Regulatory interactions](#)

[Motifs sorted by significance \(text\)](#)

[Download the whole report](#)

[Activity graph](#)

[Z-values graph](#)

[Top targets](#)

[GO analysis](#)

[Back to top](#)

**Motif ID: IRF2\_STAT2\_IRF8\_IRF1****Z-value: 5.971**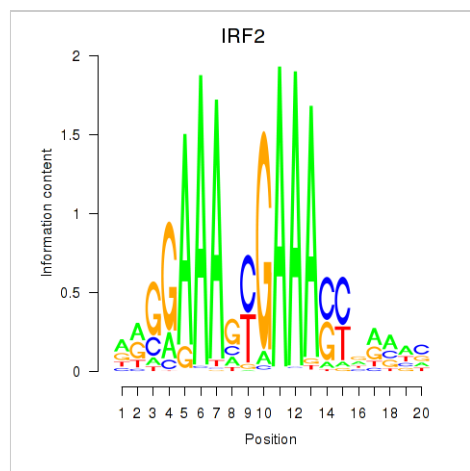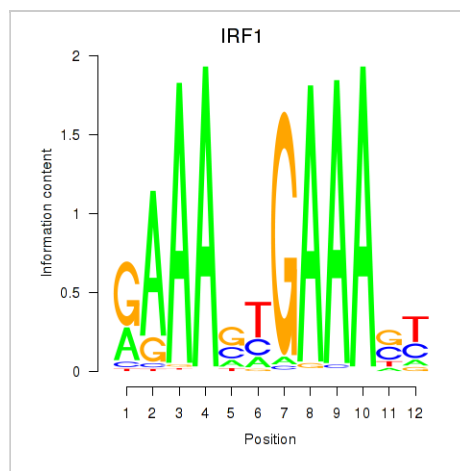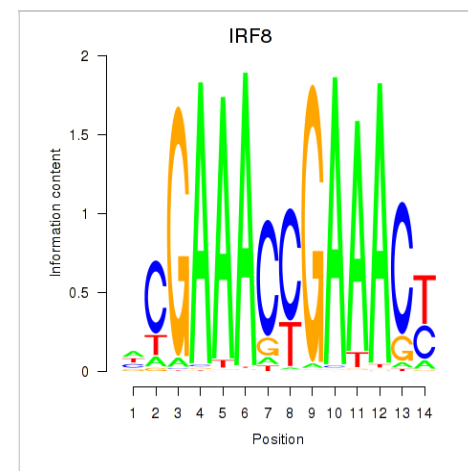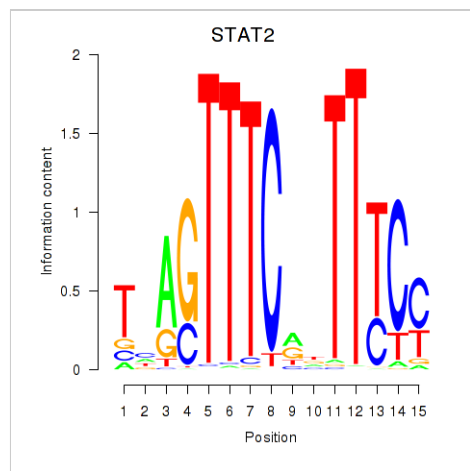**Transcription factors associated with IRF2\_STAT2\_IRF8\_IRF1:**

| Gene Symbol          | Entrez ID                         | Gene Name            |
|----------------------|-----------------------------------|----------------------|
| <a href="#">IRF1</a> | <a href="#">ENSG00000125347.9</a> | <a href="#">IRF1</a> |

|                       |                                   |                       |
|-----------------------|-----------------------------------|-----------------------|
| <a href="#">IRF2</a>  | <a href="#">ENSG00000168310.6</a> | <a href="#">IRF2</a>  |
| <a href="#">IRF8</a>  | <a href="#">ENSG00000140968.6</a> | <a href="#">IRF8</a>  |
| <a href="#">STAT2</a> | <a href="#">ENSG00000170581.9</a> | <a href="#">STAT2</a> |

**ISMARA****Project**

Final-1

**Navigation**

[All motifs sorted by activity significance](#)

[All samples sorted alphabetically](#)

[Mean activities](#)

**Downloads**

[Activities table](#)

[Activity deltas table](#)

[Regulatory interactions](#)

[Motifs sorted by significance \(text\)](#)

[Download the whole report](#)

[Activity graph](#)

[Z-values graph](#)

[Top targets](#)

[GO analysis](#)

[Back to top](#)

**Activity-expression correlation:**

| Gene Symbol | Promoter                                           | Pearson corr. coef. | P-value | Plot                   |
|-------------|----------------------------------------------------|---------------------|---------|------------------------|
| STAT2       | <a href="#">hg19_v2_chr12 - 56753858_56753930</a>  | 0.82                | 2.1e-08 | <a href="#">Click!</a> |
| IRF1        | <a href="#">hg19_v2_chr5 - 131826457_131826514</a> | 0.70                | 1.9e-05 | <a href="#">Click!</a> |
| IRF2        | <a href="#">hg19_v2_chr4 - 185395672_185395734</a> | 0.62                | 2.8e-04 | <a href="#">Click!</a> |
| IRF8        | <a href="#">hg19_v2_chr16 + 85936295_85936444</a>  | 0.29                | 1.3e-01 | <a href="#">Click!</a> |

**Activity profile for motif IRF2\_STAT2\_IRF8\_IRF1.**

**ISMARA****Project**

Final-1

**Navigation**[All motifs sorted by activity significance](#)[All samples sorted alphabetically](#)[Mean activities](#)**Downloads**[Activities table](#)[Activity deltas table](#)[Regulatory interactions](#)[Motifs sorted by significance \(text\)](#)[Download the whole report](#)**Sorted Z-values histogram for motif IRF2\_STAT2\_IRF8\_IRF1**[Activity graph](#)[Z-values graph](#)[Top targets](#)[GO analysis](#)[Back to top](#)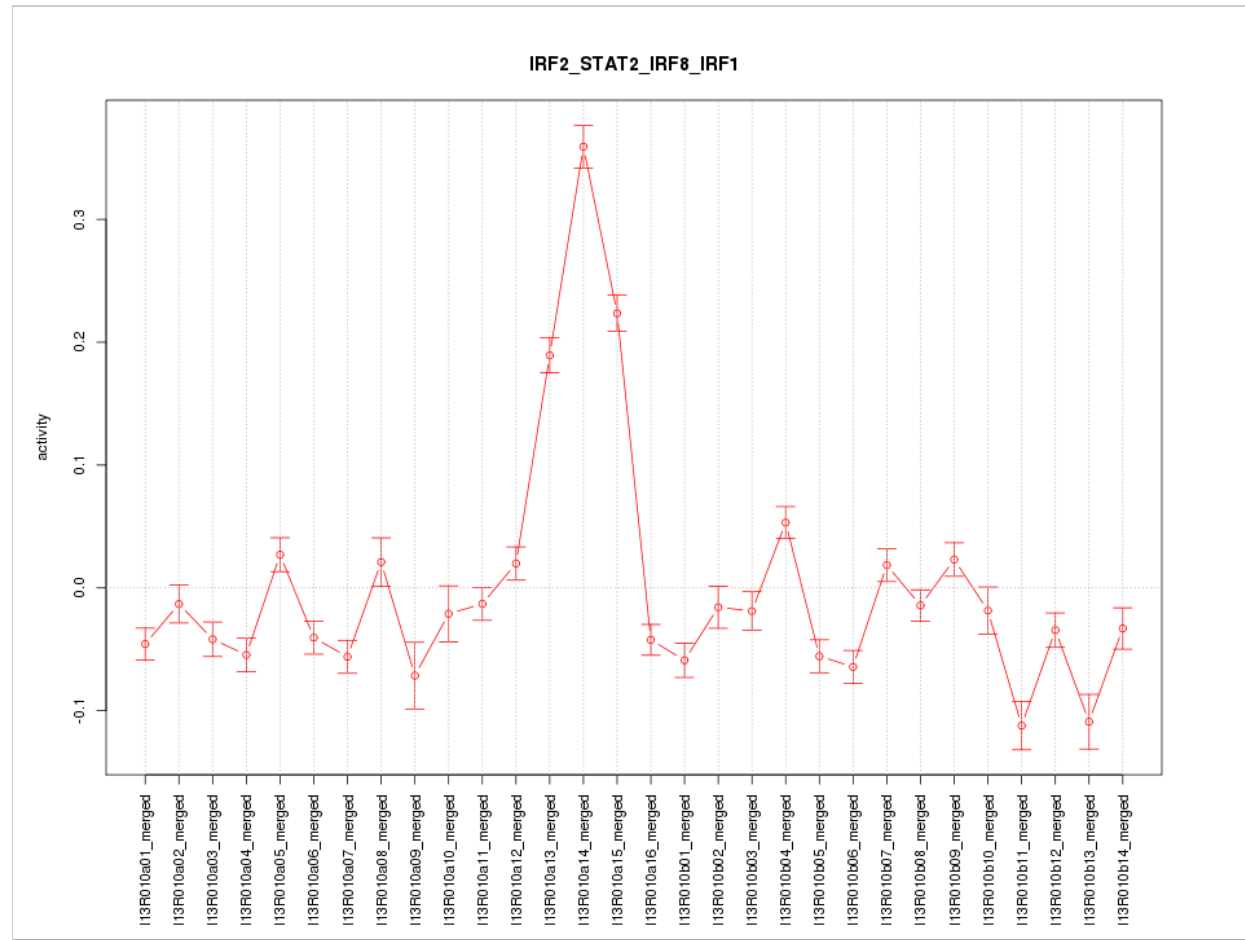

**ISMARA****Project**

Final-1

**Navigation**[All motifs sorted by activity significance](#)[All samples sorted alphabetically](#)[Mean activities](#)**Downloads**[Activities table](#)[Activity deltas table](#)[Regulatory interactions](#)[Motifs sorted by significance \(text\)](#)[Download the whole report](#)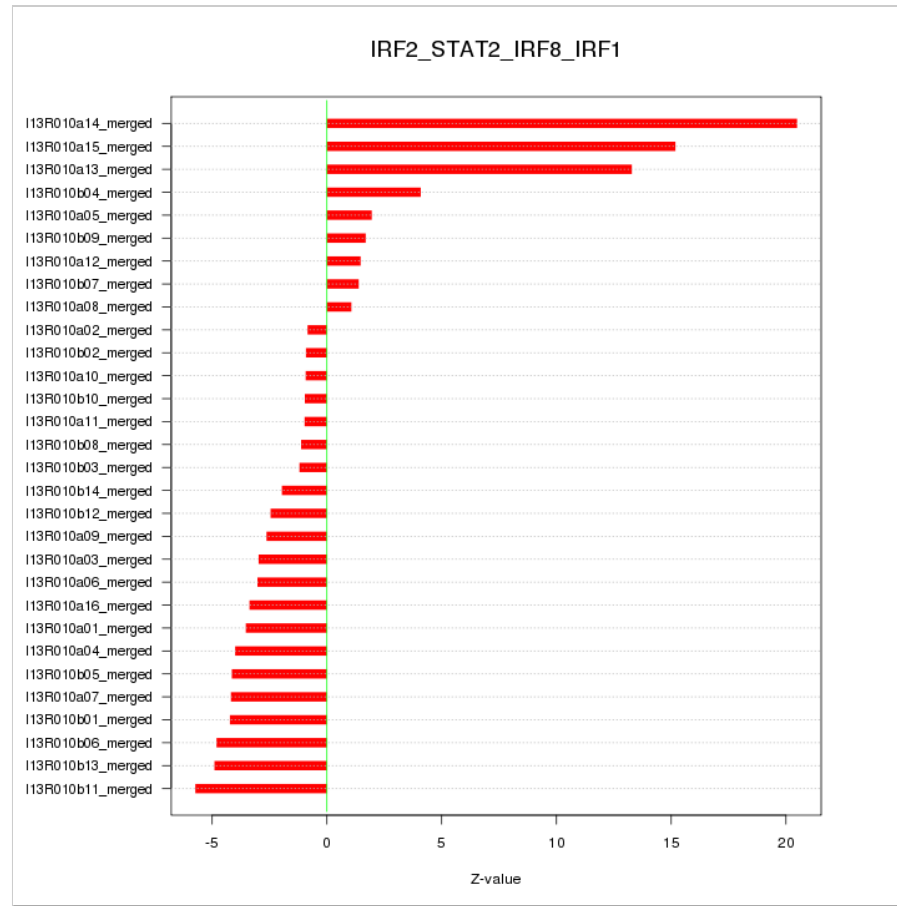

**Network of associations between targets according to the [STRING database](#).**

[Activity graph](#)[Z-values graph](#)[Top targets](#)[GO analysis](#)[Back to top](#)

**ISMARA****Project**

Final-1

**Navigation**

All motifs sorted by activity  
significance

All samples sorted  
alphabetically

Mean activities

**Downloads**

Activities table

Activity deltas table

Regulatory interactions

Motifs sorted by  
significance (text)

Download the whole report

Activity graph

Z-values graph

Top targets

GO analysis

Back to top

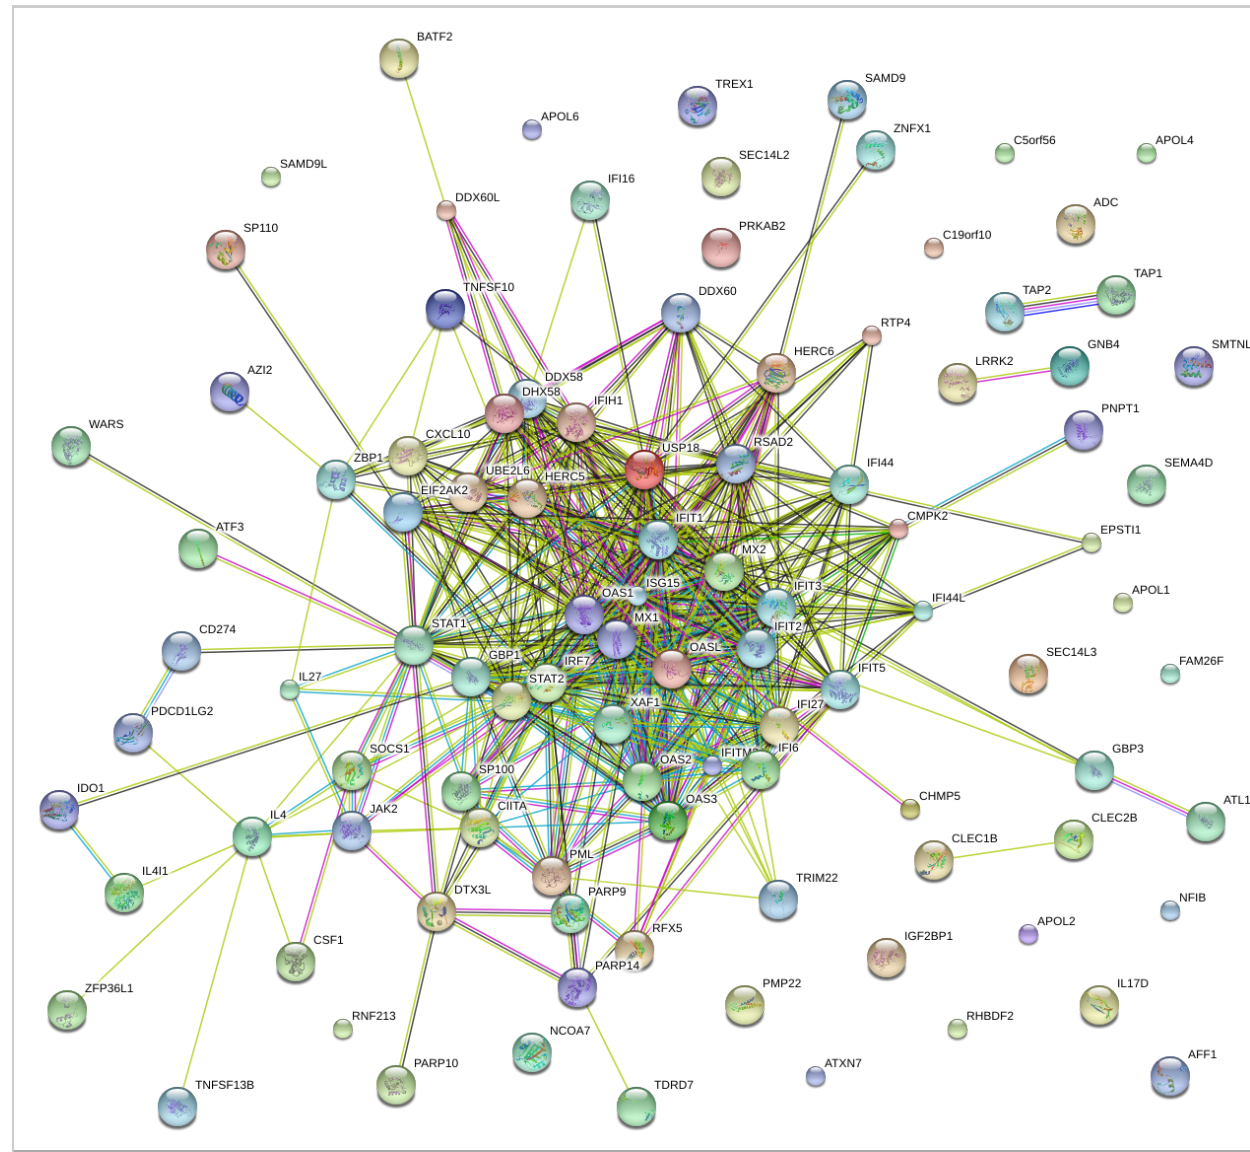**First level regulatory network of IRF2\_STAT2\_IRF8\_IRF1**

**ISMARA**

**Project**

Final-1

**Navigation**

- All motifs sorted by activity significance
- All samples sorted alphabetically
- Mean activities

**Downloads**

- Activities table
- Activity deltas table
- Regulatory interactions
- Motifs sorted by significance (text)
- Download the whole report

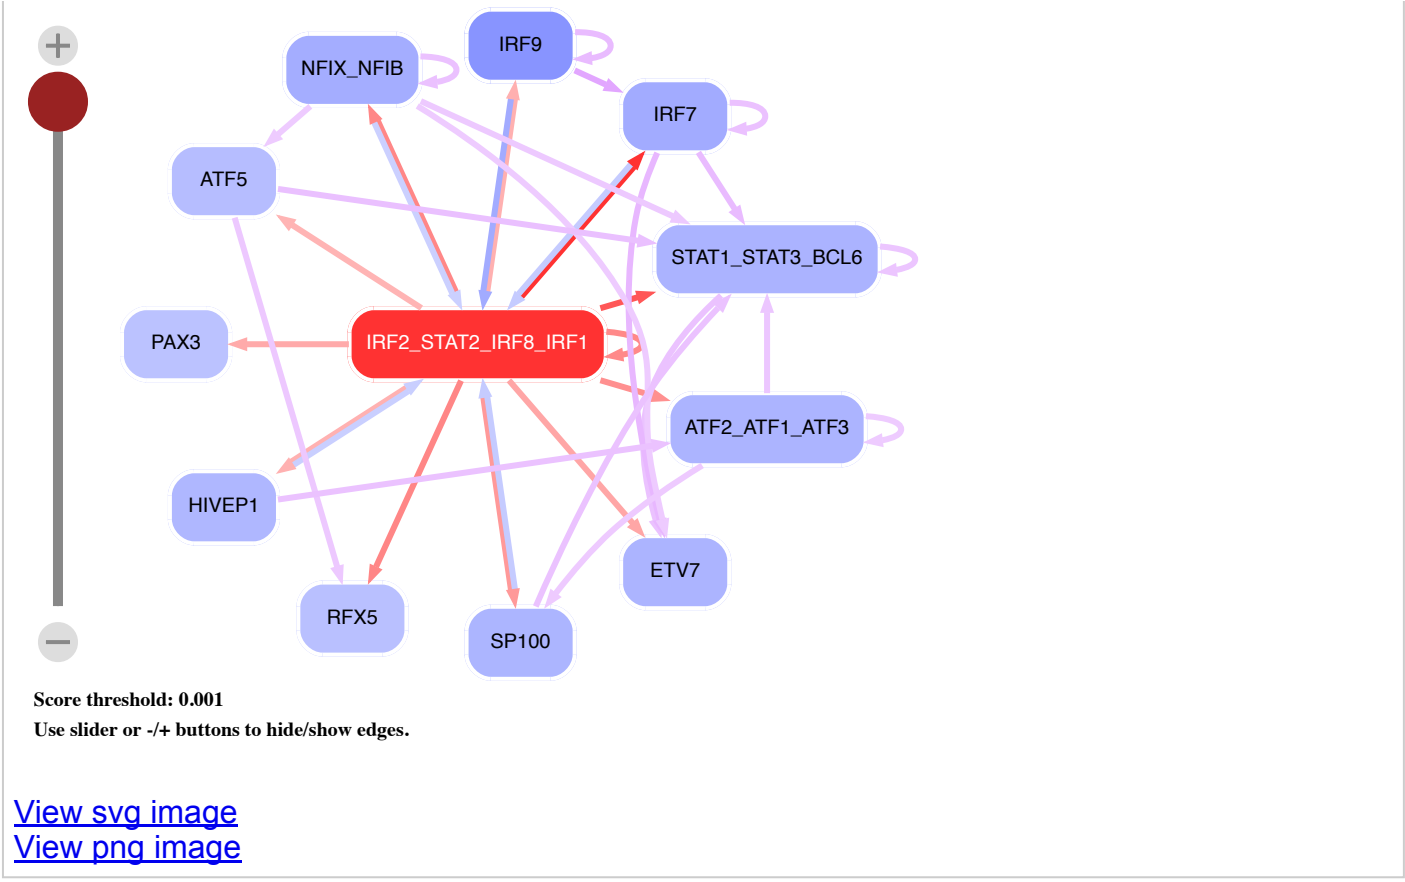

**Top targets:**

Search:

Show  entries

Showing 1 to 200 of 200 entries

- Activity graph
- Z-values graph
- Top targets
- GO analysis
- Back to top

| Promoter                       | Score  | Refseq                            | Gene Symbol           | Gene Name                                                         |
|--------------------------------|--------|-----------------------------------|-----------------------|-------------------------------------------------------------------|
| <a href="#">chr2_+_7005959</a> | 69.597 | <a href="#">ENST00000442639.1</a> | <a href="#">RSAD2</a> | <a href="#">radical S-adenosyl methionine domain containing 2</a> |
| <a href="#">chr2_+_7017796</a> | 56.421 | <a href="#">ENST00000382040.3</a> | <a href="#">RSAD2</a> | <a href="#">radical S-adenosyl methionine domain containing 2</a> |
|                                |        |                                   |                       | <a href="#">interferon-induced protein 4</a>                      |

**ISMARA****Project**

Final-1

**Navigation**

All motifs sorted by activity significance

All samples sorted alphabetically

Mean activities

**Downloads**

Activities table

Activity deltas table

Regulatory interactions

Motifs sorted by significance (text)

Download the whole report

Activity graph

Z-values graph

Top targets

GO analysis

Back to top

|                                   |        |                                                                                                             |                                                  |                                                                                                                                                      |
|-----------------------------------|--------|-------------------------------------------------------------------------------------------------------------|--------------------------------------------------|------------------------------------------------------------------------------------------------------------------------------------------------------|
| <a href="#">chr1_+_79086088</a>   | 56.379 | <a href="#">ENST00000370751.5</a><br><a href="#">ENST00000342282.3</a>                                      | <a href="#">IFI44L</a><br><a href="#">IFI44L</a> | <a href="#">4-like interferon-induced protein 4 4-like</a>                                                                                           |
| <a href="#">chr10_+_91152303</a>  | 44.091 | <a href="#">ENST00000371804.3</a>                                                                           | <a href="#">IFIT1</a>                            | <a href="#">interferon-induced protein with tetratricopeptide repeats 1</a>                                                                          |
| <a href="#">chr1_+_948803</a>     | 40.058 | <a href="#">ENST00000379389.4</a>                                                                           | <a href="#">ISG15</a>                            | <a href="#">ISG15 ubiquitin-like modifier</a>                                                                                                        |
| <a href="#">chr10_+_91087651</a>  | 38.585 | <a href="#">ENST00000371818.4</a>                                                                           | <a href="#">IFIT3</a>                            | <a href="#">interferon-induced protein with tetratricopeptide repeats 3</a>                                                                          |
| <a href="#">chr2_-_7005785</a>    | 38.074 | <a href="#">ENST00000458098.1</a><br><a href="#">ENST00000256722.5</a><br><a href="#">ENST00000404168.1</a> | <a href="#">CMPK2</a><br><a href="#">CMPK2</a>   | <a href="#">cytidine monophosphate (UMP-CMP) kinase 2, mitochondrial</a><br><a href="#">cytidine monophosphate (UMP-CMP) kinase 2, mitochondrial</a> |
| <a href="#">chr10_+_91092241</a>  | 37.841 | <a href="#">ENST00000371811.4</a>                                                                           | <a href="#">IFIT3</a>                            | <a href="#">interferon-induced protein with tetratricopeptide repeats 3</a>                                                                          |
| <a href="#">chr12_+_113376157</a> | 32.420 | <a href="#">ENST00000228928.7</a>                                                                           | <a href="#">OAS3</a>                             | <a href="#">2'-5'-oligoadenylate synthetase 3, 100kDa</a>                                                                                            |
| <a href="#">chr17_+_6659354</a>   | 31.302 | <a href="#">ENST00000574907.1</a>                                                                           | <a href="#">XAF1</a>                             | <a href="#">XIAP associated factor 1</a>                                                                                                             |
| <a href="#">chr22_+_18632666</a>  | 30.767 | <a href="#">ENST00000215794.7</a>                                                                           | <a href="#">USP18</a>                            | <a href="#">ubiquitin specific peptidase 18</a>                                                                                                      |
| <a href="#">chr4_+_89378261</a>   | 26.528 | <a href="#">ENST00000264350.3</a>                                                                           | <a href="#">HERC5</a>                            | <a href="#">HECT and RLD domain containing E3 ubiquitin protein ligase 5</a>                                                                         |
| <a href="#">chr17_+_6658878</a>   | 26.450 | <a href="#">ENST00000574394.1</a>                                                                           | <a href="#">XAF1</a>                             | <a href="#">XIAP associated factor 1</a>                                                                                                             |
| <a href="#">chr1_+_79115503</a>   | 25.933 | <a href="#">ENST00000370747.4</a><br><a href="#">ENST00000438486.1</a><br><a href="#">ENST00000545124.1</a> | <a href="#">IFI44</a><br><a href="#">IFI44</a>   | <a href="#">interferon-induced protein 4 4</a><br><a href="#">interferon-induced protein 4 4</a>                                                     |
| <a href="#">chr12_+_113416340</a> | 25.685 | <a href="#">ENST00000552756.1</a>                                                                           | <a href="#">OAS2</a>                             | <a href="#">2'-5'-oligoadenylate synthetase 2, 100kDa</a>                                                                                            |

**ISMARA**

**Project**

**Final-1**

**Navigation**

All motifs sorted by activity significance

All samples sorted alphabetically

Mean activities

**Downloads**

Activities table

Activity deltas table

Regulatory interactions

Motifs sorted by significance (text)

Download the whole report

Activity graph

Z-values graph

Top targets

GO analysis

Back to top

|                                  |        |                                                                                                                                                                                                                                                                                                                                           |                                                  |                                                                                                                                                |
|----------------------------------|--------|-------------------------------------------------------------------------------------------------------------------------------------------------------------------------------------------------------------------------------------------------------------------------------------------------------------------------------------------|--------------------------------------------------|------------------------------------------------------------------------------------------------------------------------------------------------|
|                                  |        |                                                                                                                                                                                                                                                                                                                                           |                                                  | <a href="#">ase 2. 69/71kDa</a>                                                                                                                |
| <a href="#">chr17_-40264321</a>  | 25.529 | <a href="#">ENST00000430773.1</a><br><a href="#">ENST00000413196.2</a>                                                                                                                                                                                                                                                                    | <a href="#">DHX58</a><br><a href="#">DHX58</a>   | <a href="#">DEXH (Asp-Glu-X-His) box polypeptide 58</a><br><a href="#">DEXH (Asp-Glu-X-His) box polypeptide 58</a>                             |
| <a href="#">chr12_+113376249</a> | 25.524 | <a href="#">ENST00000551007.1</a><br><a href="#">ENST00000548514.1</a>                                                                                                                                                                                                                                                                    | <a href="#">OAS3</a><br><a href="#">OAS3</a>     | <a href="#">2'-5'-oligoadenylate synthetase 3. 100kDa</a><br><a href="#">2'-5'-oligoadenylate synthetase 3. 100kDa</a>                         |
| <a href="#">chr4_-169239921</a>  | 24.929 | <a href="#">ENST00000514995.1</a><br><a href="#">ENST00000393743.3</a>                                                                                                                                                                                                                                                                    | <a href="#">DDX60</a><br><a href="#">DDX60</a>   | <a href="#">DEAD (Asp-Glu-Ala-Asp) box polypeptide 60</a><br><a href="#">DEAD (Asp-Glu-Ala-Asp) box polypeptide 60</a>                         |
| <a href="#">chr13_-43566301</a>  | 24.729 | <a href="#">ENST00000313624.7</a><br><a href="#">ENST00000398762.3</a><br><a href="#">ENST00000313640.7</a>                                                                                                                                                                                                                               | <a href="#">EPST11</a><br><a href="#">EPST11</a> | <a href="#">epithelial stromal interaction 1 (breast)</a><br><a href="#">epithelial stromal interaction 1 (breast)</a>                         |
| <a href="#">chr11_-64764435</a>  | 24.560 | <a href="#">ENST00000301887.4</a><br><a href="#">ENST00000534177.1</a>                                                                                                                                                                                                                                                                    | <a href="#">BATF2</a><br><a href="#">BATF2</a>   | <a href="#">basic leucine zipper transcription factor, ATF-like 2</a><br><a href="#">basic leucine zipper transcription factor, ATF-like 2</a> |
| <a href="#">chr14_+94577074</a>  | 24.433 | <a href="#">ENST00000555744.1</a><br><a href="#">ENST00000444961.1</a><br><a href="#">ENST00000448882.1</a><br><a href="#">ENST00000557098.1</a><br><a href="#">ENST00000554800.1</a><br><a href="#">ENST00000556544.1</a><br><a href="#">ENST00000298902.5</a><br><a href="#">ENST00000555819.1</a><br><a href="#">ENST00000557634.1</a> | <a href="#">IFI27</a><br><a href="#">IFI27</a>   | <a href="#">interferon, alpha-inducible protein 27</a><br><a href="#">interferon, alpha-inducible protein 27</a>                               |
| <a href="#">chr10_+91174486</a>  | 22.921 | <a href="#">ENST00000416601.1</a>                                                                                                                                                                                                                                                                                                         | <a href="#">IFIT5</a>                            | <a href="#">interferon-induced protein with tetratricopeptide repeats 5</a>                                                                    |
| <a href="#">chr4_+89300158</a>   | 22.724 | <a href="#">ENST00000502870.1</a>                                                                                                                                                                                                                                                                                                         | <a href="#">HERC6</a>                            | <a href="#">HECT and RLD domain containing E3 ubiquitin protei</a>                                                                             |



**ISMARA**

**Project**

**Final-1**

**Navigation**

All motifs sorted by activity significance

All samples sorted alphabetically

Mean activities

**Downloads**

Activities table

Activity deltas table

Regulatory interactions

Motifs sorted by significance (text)

Download the whole report

Activity graph

Z-values graph

Top targets

GO analysis

Back to top

|                                  |        |                                                                                                                                                  |                                                |                                                                                                                            |
|----------------------------------|--------|--------------------------------------------------------------------------------------------------------------------------------------------------|------------------------------------------------|----------------------------------------------------------------------------------------------------------------------------|
|                                  |        |                                                                                                                                                  |                                                | <a href="#">n ligase family member 6</a>                                                                                   |
| <a href="#">chr4_-76944621</a>   | 22.397 | <a href="#">ENST00000306602.1</a>                                                                                                                | <a href="#">CXCL10</a>                         | <a href="#">chemokine (C-X-C motif) ligand 10</a>                                                                          |
| <a href="#">chr12_+113416265</a> | 21.771 | <a href="#">ENST00000449768.2</a>                                                                                                                | <a href="#">OAS2</a>                           | <a href="#">2'-5'-oligoadenylate synthetase 2, 69/71kDa</a>                                                                |
| <a href="#">chr12_+113416191</a> | 21.351 | <a href="#">ENST00000342315.4</a><br><a href="#">ENST00000392583.2</a>                                                                           | <a href="#">OAS2</a><br><a href="#">OAS2</a>   | <a href="#">2'-5'-oligoadenylate synthetase 2, 69/71kDa</a><br><a href="#">2'-5'-oligoadenylate synthetase 2, 69/71kDa</a> |
| <a href="#">chr9_+5450503</a>    | 19.893 | <a href="#">ENST00000381577.3</a><br><a href="#">ENST00000381573.4</a>                                                                           | <a href="#">CD274</a><br><a href="#">CD274</a> | <a href="#">CD274 molecule</a><br><a href="#">CD274 molecule</a>                                                           |
| <a href="#">chr21_+42792442</a>  | 19.836 | <a href="#">ENST00000398600.2</a>                                                                                                                | <a href="#">MX1</a>                            | <a href="#">myxovirus (influenza virus) resistance 1, interferon-inducible protein p78 (mouse)</a>                         |
| <a href="#">chr10_+91061712</a>  | 19.794 | <a href="#">ENST00000371826.3</a>                                                                                                                | <a href="#">IFIT2</a>                          | <a href="#">interferon-induced protein with tetratricopeptide repeats 2</a>                                                |
| <a href="#">chr3_+122399697</a>  | 19.502 | <a href="#">ENST00000494811.1</a>                                                                                                                | <a href="#">PARP14</a>                         | <a href="#">poly (ADP-ribose) polymerase family, member 14</a>                                                             |
| <a href="#">chr10_+91174314</a>  | 19.292 | <a href="#">ENST00000371795.4</a>                                                                                                                | <a href="#">IFIT5</a>                          | <a href="#">interferon-induced protein with tetratricopeptide repeats 5</a>                                                |
| <a href="#">chr1_-27998689</a>   | 17.923 | <a href="#">ENST00000339145.4</a><br><a href="#">ENST00000362020.4</a><br><a href="#">ENST00000361157.6</a>                                      | <a href="#">IFI6</a><br><a href="#">IFI6</a>   | <a href="#">interferon, alpha-inducible protein 6</a><br><a href="#">interferon, alpha-inducible protein 6</a>             |
| <a href="#">chr17_+6659153</a>   | 17.782 | <a href="#">ENST00000361842.3</a><br><a href="#">ENST00000441631.1</a><br><a href="#">ENST00000438512.1</a><br><a href="#">ENST00000346752.4</a> | <a href="#">XAF1</a><br><a href="#">XAF1</a>   | <a href="#">XIAP associated factor 1</a><br><a href="#">XIAP associated factor 1</a>                                       |
| <a href="#">chr3_+187086120</a>  | 17.094 | <a href="#">ENST00000259030.2</a>                                                                                                                | <a href="#">RTP4</a>                           | <a href="#">receptor (chemosensory) transporter protein 4</a>                                                              |
| <a href="#">chr16_-28518153</a>  | 16.848 | <a href="#">ENST00000356897.1</a>                                                                                                                | <a href="#">IL27</a>                           | <a href="#">interleukin 27</a>                                                                                             |
| <a href="#">chr9_+5510558</a>    | 16.841 | <a href="#">ENST00000397747.3</a>                                                                                                                | <a href="#">PDCD1LG2</a>                       | <a href="#">programmed cell death 1 ligand 2</a>                                                                           |

**ISMARA****Project**

Final-1

**Navigation**

All motifs sorted by activity significance

All samples sorted alphabetically

Mean activities

**Downloads**

Activities table

Activity deltas table

Regulatory interactions

Motifs sorted by significance (text)

Download the whole report

Activity graph

Z-values graph

Top targets

GO analysis

Back to top

|                                  |        |                                                                                                                                                                                                                                                                 |                                                  |                                                                                                                              |
|----------------------------------|--------|-----------------------------------------------------------------------------------------------------------------------------------------------------------------------------------------------------------------------------------------------------------------|--------------------------------------------------|------------------------------------------------------------------------------------------------------------------------------|
| <a href="#">chr9_+_5510492</a>   | 15.654 | <a href="#">ENST00000397745.2</a>                                                                                                                                                                                                                               | <a href="#">PDCD1LG2</a>                         | <a href="#">programmed cell death 1 ligand 2</a>                                                                             |
| <a href="#">chr17_-_40264692</a> | 15.241 | <a href="#">ENST00000591220.1</a><br><a href="#">ENST00000251642.3</a>                                                                                                                                                                                          | <a href="#">DHX58</a><br><a href="#">DHX58</a>   | <a href="#">DEXH (Asp-Glu-X-His) box polypeptide 58</a><br><a href="#">DEXH (Asp-Glu-X-His) box polypeptide 58</a>           |
| <a href="#">chr7_-_92777606</a>  | 14.970 | <a href="#">ENST00000318238.4</a><br><a href="#">ENST00000437805.1</a><br><a href="#">ENST00000446959.1</a><br><a href="#">ENST00000439952.1</a><br><a href="#">ENST00000414791.1</a><br><a href="#">ENST00000446033.1</a><br><a href="#">ENST00000411955.1</a> | <a href="#">SAMD9L</a><br><a href="#">SAMD9L</a> | <a href="#">sterile alpha motif domain containing 9-like</a><br><a href="#">sterile alpha motif domain containing 9-like</a> |
| <a href="#">chr11_-_615942</a>   | 14.786 | <a href="#">ENST00000397574.2</a><br><a href="#">ENST00000397562.3</a><br><a href="#">ENST00000330243.5</a><br><a href="#">ENST00000397570.1</a>                                                                                                                | <a href="#">IRF7</a><br><a href="#">IRF7</a>     | <a href="#">interferon regulatory factor 7</a><br><a href="#">interferon regulatory factor 7</a>                             |
| <a href="#">chr1_-_89488510</a>  | 14.490 | <a href="#">ENST00000564665.1</a><br><a href="#">ENST00000370481.4</a>                                                                                                                                                                                          | <a href="#">GBP3</a><br><a href="#">GBP3</a>     | <a href="#">guanylate binding protein 3</a><br><a href="#">guanylate binding protein 3</a>                                   |
| <a href="#">chr20_-_56195449</a> | 14.359 | <a href="#">ENST00000541799.1</a>                                                                                                                                                                                                                               | <a href="#">ZBP1</a>                             | <a href="#">Z-DNA binding protein 1</a>                                                                                      |
| <a href="#">chr9_-_32526184</a>  | 13.721 | <a href="#">ENST00000545044.1</a><br><a href="#">ENST00000379868.1</a>                                                                                                                                                                                          | <a href="#">DDX58</a><br><a href="#">DDX58</a>   | <a href="#">DEAD (Asp-Glu-Ala-Asp) box polypeptide 58</a><br><a href="#">DEAD (Asp-Glu-Ala-Asp) box polypeptide 58</a>       |
| <a href="#">chr1_-_89531041</a>  | 13.642 | <a href="#">ENST00000370473.4</a>                                                                                                                                                                                                                               | <a href="#">GBP1</a>                             | <a href="#">guanylate binding protein 1, interferon-inducible</a>                                                            |
| <a href="#">chr9_-_32526299</a>  | 12.917 | <a href="#">ENST00000379883.2</a><br><a href="#">ENST00000379882.1</a>                                                                                                                                                                                          | <a href="#">DDX58</a><br><a href="#">DDX58</a>   | <a href="#">DEAD (Asp-Glu-Ala-Asp) box polypeptide 58</a><br><a href="#">DEAD (Asp-Glu-Ala-Asp) box polypeptide 58</a>       |
| <a href="#">chr2_-_163175133</a> | 12.832 | <a href="#">ENST00000263642.2</a><br><a href="#">ENST00000421365.2</a>                                                                                                                                                                                          | <a href="#">IFIH1</a><br><a href="#">IFIH1</a>   | <a href="#">interferon induced with helicase C domain 1</a>                                                                  |

**ISMARA****Project**

Final-1

**Navigation**

All motifs sorted by activity significance

All samples sorted alphabetically

Mean activities

**Downloads**

Activities table

Activity deltas table

Regulatory interactions

Motifs sorted by significance (text)

Download the whole report

Activity graph

Z-values graph

Top targets

GO analysis

Back to top

|                                   |        |                                                                                                                                                  |                                                    |                                                                                                                                                        |
|-----------------------------------|--------|--------------------------------------------------------------------------------------------------------------------------------------------------|----------------------------------------------------|--------------------------------------------------------------------------------------------------------------------------------------------------------|
|                                   |        |                                                                                                                                                  |                                                    | <a href="#">interferon induced with heli case C domain 1</a>                                                                                           |
| <a href="#">chr12_+_113344811</a> | 12.371 | <a href="#">ENST00000551241.1</a><br><a href="#">ENST00000553185.1</a><br><a href="#">ENST00000550689.1</a>                                      | <a href="#">OAS1</a><br><a href="#">OAS1</a>       | <a href="#">2'-5'-oligoadenylate synthetase 1, 40/46kDa</a><br><a href="#">2'-5'-oligoadenylate synthetase 1, 40/46kDa</a>                             |
| <a href="#">chr2_-37384175</a>    | 12.008 | <a href="#">ENST00000390013.3</a><br><a href="#">ENST00000411537.2</a><br><a href="#">ENST00000233057.4</a><br><a href="#">ENST00000395127.2</a> | <a href="#">EIF2AK2</a><br><a href="#">EIF2AK2</a> | <a href="#">eukaryotic translation initiation factor 2-alpha kinase 2</a><br><a href="#">eukaryotic translation initiation factor 2-alpha kinase 2</a> |
| <a href="#">chr11_-615570</a>     | 12.006 | <a href="#">ENST00000525445.1</a><br><a href="#">ENST00000348655.6</a><br><a href="#">ENST00000397566.1</a>                                      | <a href="#">IRF7</a><br><a href="#">IRF7</a>       | <a href="#">interferon regulatory factor 7</a><br><a href="#">interferon regulatory factor 7</a>                                                       |
| <a href="#">chr3_+_122283175</a>  | 11.651 | <a href="#">ENST00000383661.3</a>                                                                                                                | <a href="#">DTX3L</a>                              | <a href="#">deltex 3-like (Drosophila)</a>                                                                                                             |
| <a href="#">chr20_-56195525</a>   | 11.602 | <a href="#">ENST00000371173.3</a><br><a href="#">ENST00000395822.3</a><br><a href="#">ENST00000340462.4</a><br><a href="#">ENST00000343535.4</a> | <a href="#">ZBP1</a><br><a href="#">ZBP1</a>       | <a href="#">Z-DNA binding protein 1</a><br><a href="#">Z-DNA binding protein 1</a>                                                                     |
| <a href="#">chr11_+_5711010</a>   | 11.426 | <a href="#">ENST00000454828.1</a>                                                                                                                | <a href="#">TRIM22</a>                             | <a href="#">tripartite motif containing 22</a>                                                                                                         |
| <a href="#">chr5_+_131746575</a>  | 11.406 | <a href="#">ENST00000337752.2</a><br><a href="#">ENST00000378947.3</a><br><a href="#">ENST00000407797.1</a>                                      | <a href="#">C5orf56</a><br><a href="#">C5orf56</a> | <a href="#">chromosome 5 open reading frame 56</a><br><a href="#">chromosome 5 open reading frame 56</a>                                               |
| <a href="#">chr2_-191878681</a>   | 11.226 | <a href="#">ENST00000409465.1</a>                                                                                                                | <a href="#">STAT1</a>                              | <a href="#">signal transducer and activator of transcription 1, 91kDa</a>                                                                              |
| <a href="#">chr9_+_100174232</a>  | 11.106 | <a href="#">ENST00000355295.4</a>                                                                                                                | <a href="#">TDRD7</a>                              | <a href="#">tudor domain containing 7</a>                                                                                                              |
| <a href="#">chr14_-100841794</a>  | 10.771 | <a href="#">ENST00000556295.1</a><br><a href="#">ENST00000554820.1</a>                                                                           | <a href="#">WARS</a><br><a href="#">WARS</a>       | <a href="#">tryptophanyl-tRNA synthetase</a><br><a href="#">tryptophanyl-tRNA synthetase</a>                                                           |

**ISMARA**

**Project**

**Final-1**

**Navigation**

All motifs sorted by activity significance

All samples sorted alphabetically

Mean activities

**Downloads**

Activities table

Activity deltas table

Regulatory interactions

Motifs sorted by significance (text)

Download the whole report

Activity graph

Z-values graph

Top targets

GO analysis

Back to top

|                                 |        |                                                                                                                                                                                       |                                                              |                                                                                                                                                                |
|---------------------------------|--------|---------------------------------------------------------------------------------------------------------------------------------------------------------------------------------------|--------------------------------------------------------------|----------------------------------------------------------------------------------------------------------------------------------------------------------------|
| <a href="#">chr4_-169401628</a> | 10.759 | <a href="#">ENST00000514748.1</a><br><a href="#">ENST00000512371.1</a><br><a href="#">ENST00000260184.7</a><br><a href="#">ENST00000505890.1</a><br><a href="#">ENST00000511577.1</a> | <a href="#">DDX60L</a><br><br><br><br><a href="#">DDX60L</a> | <a href="#">DEAD (Asp-Glu-Ala-Asp) box polypeptide 60-like</a><br><br><br><br><a href="#">DEAD (Asp-Glu-Ala-Asp) box polypeptide 60-like</a>                   |
| <a href="#">chr3_+122399444</a> | 10.698 | <a href="#">ENST00000474629.2</a>                                                                                                                                                     | <a href="#">PARP14</a>                                       | <a href="#">poly (ADP-ribose) polymerase family, member 14</a>                                                                                                 |
| <a href="#">chr9_+100174344</a> | 10.510 | <a href="#">ENST00000422139.2</a>                                                                                                                                                     | <a href="#">TDRD7</a>                                        | <a href="#">tudor domain containing 7</a>                                                                                                                      |
| <a href="#">chr3_-122283079</a> | 10.248 | <a href="#">ENST00000471785.1</a><br><a href="#">ENST00000466126.1</a>                                                                                                                | <a href="#">PARP9</a><br><a href="#">PARP9</a>               | <a href="#">poly (ADP-ribose) polymerase family, member 9</a><br><a href="#">poly (ADP-ribose) polymerase family, member 9</a>                                 |
| <a href="#">chr21_+42797958</a> | 10.197 | <a href="#">ENST00000419044.1</a>                                                                                                                                                     | <a href="#">MX1</a>                                          | <a href="#">myxovirus (influenza virus) resistance 1, interferon-inducible protein p78 (mouse)</a>                                                             |
| <a href="#">chr21_+42798158</a> | 10.118 | <a href="#">ENST00000441677.1</a>                                                                                                                                                     | <a href="#">MX1</a>                                          | <a href="#">myxovirus (influenza virus) resistance 1, interferon-inducible protein p78 (mouse)</a>                                                             |
| <a href="#">chr21_+42798124</a> | 10.063 | <a href="#">ENST00000417963.1</a>                                                                                                                                                     | <a href="#">MX1</a>                                          | <a href="#">myxovirus (influenza virus) resistance 1, interferon-inducible protein p78 (mouse)</a>                                                             |
| <a href="#">chr11_-57334732</a> | 9.683  | <a href="#">ENST00000527022.1</a><br><a href="#">ENST00000526659.1</a>                                                                                                                | <a href="#">UBE2L6</a><br><a href="#">UBE2L6</a>             | <a href="#">ubiquitin-conjugating enzyme E2L 6</a><br><a href="#">ubiquitin-conjugating enzyme E2L 6</a>                                                       |
| <a href="#">chr2_-191878874</a> | 9.548  | <a href="#">ENST00000392322.3</a><br><a href="#">ENST00000392323.2</a><br><a href="#">ENST00000424722.1</a><br><a href="#">ENST00000361099.3</a>                                      | <a href="#">STAT1</a><br><br><br><a href="#">STAT1</a>       | <a href="#">signal transducer and activator of transcription 1, 91kDa</a><br><br><br><a href="#">signal transducer and activator of transcription 1, 91kDa</a> |
| <a href="#">chr17_+78234625</a> | 9.508  | <a href="#">ENST00000508628.2</a><br><a href="#">ENST00000582970.1</a>                                                                                                                | <a href="#">RNF213</a>                                       | <a href="#">ring finger protein 213</a>                                                                                                                        |

**ISMARA****Project**

Final-1

**Navigation**

All motifs sorted by activity significance

All samples sorted alphabetically

Mean activities

**Downloads**

Activities table

Activity deltas table

Regulatory interactions

Motifs sorted by significance (text)

Download the whole report

Activity graph

Z-values graph

Top targets

GO analysis

Back to top

|                                   |       |                                                                                                                                                                                                                            |                                                  |                                                                                                                                |
|-----------------------------------|-------|----------------------------------------------------------------------------------------------------------------------------------------------------------------------------------------------------------------------------|--------------------------------------------------|--------------------------------------------------------------------------------------------------------------------------------|
|                                   |       | <a href="#">ENST00000456466.1</a><br><a href="#">ENST00000319921.4</a>                                                                                                                                                     | <a href="#">RNF213</a>                           | <a href="#">ring finger protein 213</a>                                                                                        |
| <a href="#">chr3 - 122283424</a>  | 9.493 | <a href="#">ENST00000360356.2</a><br><a href="#">ENST00000477522.2</a>                                                                                                                                                     | <a href="#">PARP9</a><br><a href="#">PARP9</a>   | <a href="#">poly (ADP-ribose) polymerase family, member 9</a><br><a href="#">poly (ADP-ribose) polymerase family, member 9</a> |
| <a href="#">chr11 + 5710919</a>   | 9.441 | <a href="#">ENST00000425490.1</a><br><a href="#">ENST00000379965.3</a>                                                                                                                                                     | <a href="#">TRIM22</a><br><a href="#">TRIM22</a> | <a href="#">tripartite motif containing 22</a><br><a href="#">tripartite motif containing 22</a>                               |
| <a href="#">chr22 + 36649170</a>  | 9.417 | <a href="#">ENST00000440669.2</a><br><a href="#">ENST00000438034.1</a><br><a href="#">ENST00000427990.1</a><br><a href="#">ENST00000347595.7</a><br><a href="#">ENST00000397279.4</a><br><a href="#">ENST00000433768.1</a> | <a href="#">APOL1</a><br><a href="#">APOL1</a>   | <a href="#">apolipoprotein L, 1</a><br><a href="#">apolipoprotein L, 1</a>                                                     |
| <a href="#">chr3 + 63897605</a>   | 8.963 | <a href="#">ENST00000487717.1</a>                                                                                                                                                                                          | <a href="#">ATXN7</a>                            | <a href="#">ataxin 7</a>                                                                                                       |
| <a href="#">chr22 - 36635598</a>  | 8.802 | <a href="#">ENST00000454728.1</a>                                                                                                                                                                                          | <a href="#">APOL2</a>                            | <a href="#">apolipoprotein L, 2</a>                                                                                            |
| <a href="#">chr3 - 179169330</a>  | 8.471 | <a href="#">ENST00000232564.3</a>                                                                                                                                                                                          | <a href="#">GNB4</a>                             | <a href="#">guanine nucleotide binding protein (G protein), beta polypeptide 4</a>                                             |
| <a href="#">chr22 - 36600727</a>  | 8.436 | <a href="#">ENST00000328429.4</a><br><a href="#">ENST00000397275.2</a>                                                                                                                                                     | <a href="#">APOL4</a><br><a href="#">APOL4</a>   | <a href="#">apolipoprotein L, 4</a><br><a href="#">apolipoprotein L, 4</a>                                                     |
| <a href="#">chr17 - 74489215</a>  | 8.428 | <a href="#">ENST00000585701.1</a><br><a href="#">ENST00000591192.1</a><br><a href="#">ENST00000589526.1</a>                                                                                                                | <a href="#">RHBDF2</a><br><a href="#">RHBDF2</a> | <a href="#">rhomboid 5 homolog 2 (Drosophila)</a><br><a href="#">rhomboid 5 homolog 2 (Drosophila)</a>                         |
| <a href="#">chr9 + 33264861</a>   | 8.355 | <a href="#">ENST00000223500.8</a>                                                                                                                                                                                          | <a href="#">CHMP5</a>                            | <a href="#">charged multivesicular body protein 5</a>                                                                          |
| <a href="#">chr22 + 36044411</a>  | 8.329 | <a href="#">ENST00000409652.4</a>                                                                                                                                                                                          | <a href="#">APOL6</a>                            | <a href="#">apolipoprotein L, 6</a>                                                                                            |
| <a href="#">chr12 + 113344755</a> | 8.308 | <a href="#">ENST00000550883.1</a>                                                                                                                                                                                          | <a href="#">OAS1</a>                             | <a href="#">2'-5'-oligoadenylate synthetase 1, 40/46kDa</a>                                                                    |
| <a href="#">chr3 - 122283100</a>  | 8.227 | <a href="#">ENST00000462315.1</a><br><a href="#">ENST00000492382.1</a>                                                                                                                                                     | <a href="#">PARP9</a><br><a href="#">PARP9</a>   | <a href="#">poly (ADP-ribose) polymerase family, member 9</a><br><a href="#">poly (ADP-ribose) polymerase family, member 9</a> |
|                                   |       |                                                                                                                                                                                                                            |                                                  | <a href="#">charged multivesicular bod</a>                                                                                     |

**ISMARA****Project**

Final-1

**Navigation**[All motifs sorted by activity significance](#)[All samples sorted alphabetically](#)[Mean activities](#)**Downloads**[Activities table](#)[Activity deltas table](#)[Regulatory interactions](#)[Motifs sorted by significance \(text\)](#)[Download the whole report](#)[Activity graph](#)[Z-values graph](#)[Top targets](#)[GO analysis](#)[Back to top](#)

|                                   |       |                                                                                                                                                                                                                            |                                                      |                                                                                                                                                                                                          |
|-----------------------------------|-------|----------------------------------------------------------------------------------------------------------------------------------------------------------------------------------------------------------------------------|------------------------------------------------------|----------------------------------------------------------------------------------------------------------------------------------------------------------------------------------------------------------|
| <a href="#">chr9 + 33265011</a>   | 8.208 | <a href="#">ENST00000419016.2</a>                                                                                                                                                                                          | <a href="#">CHMP5</a>                                | <a href="#">y protein 5</a>                                                                                                                                                                              |
| <a href="#">chr8 - 145060593</a>  | 8.144 | <a href="#">ENST00000313059.5</a><br><a href="#">ENST00000524918.1</a><br><a href="#">ENST00000313028.7</a><br><a href="#">ENST00000525773.1</a>                                                                           | <a href="#">PARP10</a><br><br><a href="#">PARP10</a> | <a href="#">poly (ADP-ribose) polymerase family, member 10</a><br><br><a href="#">poly (ADP-ribose) polymerase family, member 10</a>                                                                     |
| <a href="#">chr21 + 42733870</a>  | 8.122 | <a href="#">ENST00000330714.3</a><br><a href="#">ENST00000436410.1</a><br><a href="#">ENST00000435611.1</a>                                                                                                                | <a href="#">MX2</a><br><br><a href="#">MX2</a>       | <a href="#">myxovirus (influenza virus) resistance 2 (mouse)</a><br><br><a href="#">myxovirus (influenza virus) resistance 2 (mouse)</a>                                                                 |
| <a href="#">chr21 + 42798094</a>  | 8.073 | <a href="#">ENST00000424365.1</a><br><a href="#">ENST00000398598.3</a><br><a href="#">ENST00000455164.2</a>                                                                                                                | <a href="#">MX1</a><br><a href="#">MX1</a>           | <a href="#">myxovirus (influenza virus) resistance 1, interferon-inducible protein p78 (mouse)</a><br><a href="#">myxovirus (influenza virus) resistance 1, interferon-inducible protein p78 (mouse)</a> |
| <a href="#">chr6 - 32821599</a>   | 7.992 | <a href="#">ENST00000354258.4</a>                                                                                                                                                                                          | <a href="#">TAP1</a>                                 | <a href="#">transporter 1, ATP-binding cassette, sub-family B (MDR/TAP)</a>                                                                                                                              |
| <a href="#">chr2 - 166702601</a>  | 7.951 | <a href="#">ENST00000428888.1</a>                                                                                                                                                                                          | <a href="#">AC009495.4</a>                           | <a href="#">AC009495.4</a>                                                                                                                                                                               |
| <a href="#">chr6 + 37400974</a>   | 7.883 | <a href="#">ENST00000373451.4</a><br><a href="#">ENST00000455891.1</a>                                                                                                                                                     | <a href="#">CMTR1</a><br><a href="#">CMTR1</a>       | <a href="#">cap methyltransferase 1</a><br><a href="#">cap methyltransferase 1</a>                                                                                                                       |
| <a href="#">chr14 - 100841670</a> | 7.821 | <a href="#">ENST00000555410.1</a><br><a href="#">ENST00000557297.1</a><br><a href="#">ENST00000555813.1</a><br><a href="#">ENST00000557135.1</a><br><a href="#">ENST00000556698.1</a><br><a href="#">ENST00000554509.1</a> | <a href="#">WARS</a><br><a href="#">WARS</a>         | <a href="#">tryptophanyl-tRNA synthetase</a><br><a href="#">tryptophanyl-tRNA synthetase</a>                                                                                                             |
| <a href="#">chr15 + 74287118</a>  | 7.658 | <a href="#">ENST00000563500.1</a>                                                                                                                                                                                          | <a href="#">PML</a>                                  | <a href="#">promyelocytic leukemia</a>                                                                                                                                                                   |
| <a href="#">chr12 + 40618764</a>  | 7.654 | <a href="#">ENST00000343742.2</a>                                                                                                                                                                                          | <a href="#">LRRK2</a>                                | <a href="#">leucine-rich repeat kinase 2</a>                                                                                                                                                             |
|                                   |       |                                                                                                                                                                                                                            |                                                      | <a href="#">family with sequence simila</a>                                                                                                                                                              |

**ISMARA****Project**

Final-1

**Navigation**

All motifs sorted by activity significance

All samples sorted alphabetically

Mean activities

**Downloads**

Activities table

Activity deltas table

Regulatory interactions

Motifs sorted by significance (text)

Download the whole report

Activity graph

Z-values graph

Top targets

GO analysis

Back to top

|                                   |       |                                                                                                                                                                                                                                                                                                                                                                                                                                                          |                                                  |                                                                                                                                                                       |
|-----------------------------------|-------|----------------------------------------------------------------------------------------------------------------------------------------------------------------------------------------------------------------------------------------------------------------------------------------------------------------------------------------------------------------------------------------------------------------------------------------------------------|--------------------------------------------------|-----------------------------------------------------------------------------------------------------------------------------------------------------------------------|
| <a href="#">chr6 + 116782527</a>  | 7.551 | <a href="#">ENST00000368606.3</a><br><a href="#">ENST00000368605.1</a>                                                                                                                                                                                                                                                                                                                                                                                   | <a href="#">FAM26F</a><br><a href="#">FAM26F</a> | <a href="#">rity 26, member F</a><br><a href="#">family with sequence simila</a><br><a href="#">rity 26, member F</a>                                                 |
| <a href="#">chr9 + 4985016</a>    | 7.498 | <a href="#">ENST00000539801.1</a>                                                                                                                                                                                                                                                                                                                                                                                                                        | <a href="#">JAK2</a>                             | <a href="#">Janus kinase 2</a>                                                                                                                                        |
| <a href="#">chr15 + 74287035</a>  | 7.444 | <a href="#">ENST00000359928.4</a><br><a href="#">ENST00000395132.2</a><br><a href="#">ENST00000268059.6</a><br><a href="#">ENST00000354026.6</a><br><a href="#">ENST00000268058.3</a><br><a href="#">ENST00000565898.1</a><br><a href="#">ENST00000569477.1</a><br><a href="#">ENST00000569965.1</a><br><a href="#">ENST00000567543.1</a><br><a href="#">ENST00000436891.3</a><br><a href="#">ENST00000435786.2</a><br><a href="#">ENST00000564428.1</a> | <a href="#">PML</a><br><a href="#">PML</a>       | <a href="#">promyelocytic leukemia</a><br><a href="#">promyelocytic leukemia</a>                                                                                      |
| <a href="#">chr1 - 146644036</a>  | 7.404 | <a href="#">ENST00000425272.2</a>                                                                                                                                                                                                                                                                                                                                                                                                                        | <a href="#">PRKAB2</a>                           | <a href="#">protein kinase, AMP-activat</a><br><a href="#">ed, beta 2 non-catalytic sub</a><br><a href="#">unit</a>                                                   |
| <a href="#">chr11 - 57335280</a>  | 7.139 | <a href="#">ENST00000287156.4</a>                                                                                                                                                                                                                                                                                                                                                                                                                        | <a href="#">UBE2L6</a>                           | <a href="#">ubiquitin-conjugating enzy</a><br><a href="#">me E2L 6</a>                                                                                                |
| <a href="#">chr19 + 17516624</a>  | 7.107 | <a href="#">ENST00000596322.1</a><br><a href="#">ENST00000600008.1</a><br><a href="#">ENST00000601885.1</a>                                                                                                                                                                                                                                                                                                                                              | <a href="#">CTD-2521M24.9</a>                    | <a href="#">CTD-2521M24.9</a>                                                                                                                                         |
| <a href="#">chr12 + 113344582</a> | 7.068 | <a href="#">ENST00000452357.2</a><br><a href="#">ENST00000202917.5</a><br><a href="#">ENST00000445409.2</a>                                                                                                                                                                                                                                                                                                                                              | <a href="#">OAS1</a><br><a href="#">OAS1</a>     | <a href="#">2'-5'-oligoadenylate synthet</a><br><a href="#">ase 1, 40/46kDa</a><br><a href="#">2'-5'-oligoadenylate synthet</a><br><a href="#">ase 1, 40/46kDa</a>    |
| <a href="#">chr15 + 74287009</a>  | 6.858 | <a href="#">ENST00000395135.3</a>                                                                                                                                                                                                                                                                                                                                                                                                                        | <a href="#">PML</a>                              | <a href="#">promyelocytic leukemia</a>                                                                                                                                |
| <a href="#">chr13 + 108922228</a> | 6.837 | <a href="#">ENST00000542136.1</a>                                                                                                                                                                                                                                                                                                                                                                                                                        | <a href="#">TNFSF13B</a>                         | <a href="#">tumor necrosis factor (ligan</a><br><a href="#">d) superfamily, member 13</a><br><a href="#">b</a>                                                        |
| <a href="#">chr1 - 151319654</a>  | 6.746 | <a href="#">ENST00000412774.1</a><br><a href="#">ENST00000430227.1</a>                                                                                                                                                                                                                                                                                                                                                                                   | <a href="#">RFX5</a><br><a href="#">RFX5</a>     | <a href="#">regulatory factor X, 5 (influe</a><br><a href="#">nces HLA class II expressio</a><br><a href="#">n)</a><br><a href="#">regulatory factor X, 5 (influe</a> |

**ISMARA****Project**

Final-1

**Navigation**

All motifs sorted by activity significance

All samples sorted alphabetically

Mean activities

**Downloads**

Activities table

Activity deltas table

Regulatory interactions

Motifs sorted by significance (text)

Download the whole report

Activity graph

Z-values graph

Top targets

GO analysis

Back to top

|                                  |       |                                                                                                             |                                                    |                                                                                                                                                          |
|----------------------------------|-------|-------------------------------------------------------------------------------------------------------------|----------------------------------------------------|----------------------------------------------------------------------------------------------------------------------------------------------------------|
|                                  |       |                                                                                                             |                                                    | <a href="#">nces HLA class II expression)</a>                                                                                                            |
| <a href="#">chr16 - 11350036</a> | 6.717 | <a href="#">ENST00000332029.2</a>                                                                           | <a href="#">SOCS1</a>                              | <a href="#">suppressor of cytokine signaling 1</a>                                                                                                       |
| <a href="#">chr9 - 92020841</a>  | 6.714 | <a href="#">ENST00000433650.1</a>                                                                           | <a href="#">SEMA4D</a>                             | <a href="#">sema domain, immunoglobulin domain (Ig), transmembrane domain (TM) and short cytoplasmic domain, (semaphorin) 4D</a>                         |
| <a href="#">chr22 - 36635225</a> | 6.691 | <a href="#">ENST00000529194.1</a>                                                                           | <a href="#">APOL2</a>                              | <a href="#">apolipoprotein L, 2</a>                                                                                                                      |
| <a href="#">chr5 + 132009675</a> | 6.681 | <a href="#">ENST00000350025.2</a><br><a href="#">ENST00000231449.2</a>                                      | <a href="#">IL4</a><br><a href="#">IL4</a>         | <a href="#">interleukin 4</a><br><a href="#">interleukin 4</a>                                                                                           |
| <a href="#">chr9 - 14322319</a>  | 6.643 | <a href="#">ENST00000606230.1</a>                                                                           | <a href="#">NFIB</a>                               | <a href="#">nuclear factor I/B</a>                                                                                                                       |
| <a href="#">chr3 - 28389922</a>  | 6.587 | <a href="#">ENST00000415852.1</a>                                                                           | <a href="#">AZI2</a>                               | <a href="#">5-azacytidine induced 2</a>                                                                                                                  |
| <a href="#">chr3 - 172241250</a> | 6.485 | <a href="#">ENST00000241261.2</a><br><a href="#">ENST00000420541.2</a>                                      | <a href="#">TNFSF10</a><br><a href="#">TNFSF10</a> | <a href="#">tumor necrosis factor (ligand) superfamily, member 10</a><br><a href="#">tumor necrosis factor (ligand) superfamily, member 10</a>           |
| <a href="#">chr12 - 56753858</a> | 6.449 | <a href="#">ENST00000314128.4</a><br><a href="#">ENST00000557235.1</a><br><a href="#">ENST00000418572.2</a> | <a href="#">STAT2</a><br><a href="#">STAT2</a>     | <a href="#">signal transducer and activator of transcription 2, 113kDa</a><br><a href="#">signal transducer and activator of transcription 2, 113kDa</a> |
| <a href="#">chr6 + 126240442</a> | 6.422 | <a href="#">ENST00000444128.1</a><br><a href="#">ENST00000448104.1</a><br><a href="#">ENST00000438495.1</a> | <a href="#">NCOA7</a><br><a href="#">NCOA7</a>     | <a href="#">nuclear receptor coactivator 7</a><br><a href="#">nuclear receptor coactivator 7</a>                                                         |
| <a href="#">chr2 - 55920952</a>  | 6.390 | <a href="#">ENST00000447944.2</a>                                                                           | <a href="#">PNPT1</a>                              | <a href="#">polyribonucleotide nucleotidyltransferase 1</a>                                                                                              |
| <a href="#">chr3 - 28390415</a>  | 6.265 | <a href="#">ENST00000414162.1</a><br><a href="#">ENST00000420543.2</a>                                      | <a href="#">AZI2</a><br><a href="#">AZI2</a>       | <a href="#">5-azacytidine induced 2</a><br><a href="#">5-azacytidine induced 2</a>                                                                       |
| <a href="#">chr11 + 57308979</a> | 6.187 | <a href="#">ENST00000457912.1</a>                                                                           | <a href="#">SMTNL1</a>                             | <a href="#">smoothelin-like 1</a>                                                                                                                        |
|                                  |       |                                                                                                             |                                                    | <a href="#">transporter 2, ATP-binding</a>                                                                                                               |



**ISMARA****Project**

Final-1

**Navigation**

All motifs sorted by activity significance

All samples sorted alphabetically

Mean activities

**Downloads**

Activities table

Activity deltas table

Regulatory interactions

Motifs sorted by significance (text)

Download the whole report

Activity graph

Z-values graph

Top targets

GO analysis

Back to top

|                                   |       |                                                                                                                                                                                                                                                                 |                                                    |                                                                                                                    |
|-----------------------------------|-------|-----------------------------------------------------------------------------------------------------------------------------------------------------------------------------------------------------------------------------------------------------------------|----------------------------------------------------|--------------------------------------------------------------------------------------------------------------------|
| <a href="#">chr6 - 32806483</a>   | 6.166 | <a href="#">ENST00000374899.4</a>                                                                                                                                                                                                                               | <a href="#">TAP2</a>                               | <a href="#">cassette, sub-family B (MD R/TAP)</a>                                                                  |
| <a href="#">chr7 - 92747269</a>   | 6.074 | <a href="#">ENST00000379958.2</a><br><a href="#">ENST00000446617.1</a>                                                                                                                                                                                          | <a href="#">SAMD9</a><br><a href="#">SAMD9</a>     | <a href="#">sterile alpha motif domain containing 9</a><br><a href="#">sterile alpha motif domain containing 9</a> |
| <a href="#">chr22 + 36649056</a>  | 5.885 | <a href="#">ENST00000397278.3</a><br><a href="#">ENST00000422706.1</a><br><a href="#">ENST00000426053.1</a><br><a href="#">ENST00000319136.4</a>                                                                                                                | <a href="#">APOL1</a><br><br><a href="#">APOL1</a> | <a href="#">apolipoprotein L 1</a><br><br><a href="#">apolipoprotein L 1</a>                                       |
| <a href="#">chr11 - 321050</a>    | 5.869 | <a href="#">ENST00000399808.4</a>                                                                                                                                                                                                                               | <a href="#">IFITM3</a>                             | <a href="#">interferon induced transmembrane protein 3</a>                                                         |
| <a href="#">chr1 + 212782012</a>  | 5.775 | <a href="#">ENST00000341491.4</a><br><a href="#">ENST00000366985.1</a>                                                                                                                                                                                          | <a href="#">ATF3</a><br><a href="#">ATF3</a>       | <a href="#">activating transcription factor 3</a><br><a href="#">activating transcription factor 3</a>             |
| <a href="#">chr14 - 100841930</a> | 5.724 | <a href="#">ENST00000553934.1</a><br><a href="#">ENST00000555031.1</a><br><a href="#">ENST00000553395.1</a><br><a href="#">ENST00000553545.1</a><br><a href="#">ENST00000344102.5</a><br><a href="#">ENST00000556338.1</a><br><a href="#">ENST00000392882.2</a> | <a href="#">WARS</a><br><a href="#">WARS</a>       | <a href="#">tryptophanyl-tRNA synthetase</a><br><a href="#">tryptophanyl-tRNA synthetase</a>                       |
| <a href="#">chr12 - 121476750</a> | 5.708 | <a href="#">ENST00000543677.1</a>                                                                                                                                                                                                                               | <a href="#">OASL</a>                               | <a href="#">2'-5'-oligoadenylate synthetase-like</a>                                                               |
| <a href="#">chr14 - 69262789</a>  | 5.658 | <a href="#">ENST00000557022.1</a>                                                                                                                                                                                                                               | <a href="#">ZFP36L1</a>                            | <a href="#">ZFP36 ring finger protein-like 1</a>                                                                   |
| <a href="#">chr12 - 10022735</a>  | 5.643 | <a href="#">ENST00000228438.2</a>                                                                                                                                                                                                                               | <a href="#">CLEC2B</a>                             | <a href="#">C-type lectin domain family 2, member B</a>                                                            |
| <a href="#">chr12 - 121476959</a> | 5.633 | <a href="#">ENST00000339275.5</a>                                                                                                                                                                                                                               | <a href="#">OASL</a>                               | <a href="#">2'-5'-oligoadenylate synthetase-like</a>                                                               |
| <a href="#">chr14 - 69262947</a>  | 5.607 | <a href="#">ENST00000557086.1</a>                                                                                                                                                                                                                               | <a href="#">ZFP36L1</a>                            | <a href="#">ZFP36 ring finger protein-like 1</a>                                                                   |
|                                   |       |                                                                                                                                                                                                                                                                 |                                                    | <a href="#">indoleamine 2,3-dioxygenase</a>                                                                        |

**ISMARA****Project**

Final-1

**Navigation**

All motifs sorted by activity significance

All samples sorted alphabetically

Mean activities

**Downloads**

Activities table

Activity deltas table

Regulatory interactions

Motifs sorted by significance (text)

Download the whole report

Activity graph

Z-values graph

Top targets

GO analysis

Back to top

|                                   |       |                                                                        |                                                      |                                                                                                                                                    |
|-----------------------------------|-------|------------------------------------------------------------------------|------------------------------------------------------|----------------------------------------------------------------------------------------------------------------------------------------------------|
| <a href="#">chr8 + 39770803</a>   | 5.606 | <a href="#">ENST00000518237.1</a>                                      | <a href="#">IDO1</a>                                 | <a href="#">se 1</a>                                                                                                                               |
| <a href="#">chr2 - 231084617</a>  | 5.601 | <a href="#">ENST00000409815.2</a>                                      | <a href="#">SP110</a>                                | <a href="#">SP110 nuclear body protein</a>                                                                                                         |
| <a href="#">chr3 - 28390298</a>   | 5.538 | <a href="#">ENST00000457172.1</a>                                      | <a href="#">AZI2</a>                                 | <a href="#">5-azacytidine induced 2</a>                                                                                                            |
| <a href="#">chr22 - 36635563</a>  | 5.496 | <a href="#">ENST00000451256.2</a>                                      | <a href="#">APOL2</a>                                | <a href="#">apolipoprotein L 2</a>                                                                                                                 |
| <a href="#">chr1 + 158979686</a>  | 5.448 | <a href="#">ENST00000368132.3</a><br><a href="#">ENST00000295809.7</a> | <a href="#">IFI16</a><br><a href="#">IFI16</a>       | <a href="#">interferon, gamma-inducible protein 16</a><br><a href="#">interferon, gamma-inducible protein 16</a>                                   |
| <a href="#">chr1 + 158979792</a>  | 5.367 | <a href="#">ENST00000430894.2</a><br><a href="#">ENST00000359709.3</a> | <a href="#">IFI16</a><br><a href="#">IFI16</a>       | <a href="#">interferon, gamma-inducible protein 16</a><br><a href="#">interferon, gamma-inducible protein 16</a>                                   |
| <a href="#">chr12 - 121477039</a> | 5.319 | <a href="#">ENST00000257570.5</a>                                      | <a href="#">OASL</a>                                 | <a href="#">2'-5'-oligoadenylate synthetase-like</a>                                                                                               |
| <a href="#">chr13 + 108921977</a> | 5.304 | <a href="#">ENST00000375887.4</a><br><a href="#">ENST00000430559.1</a> | <a href="#">TNFSF13B</a><br><a href="#">TNFSF13B</a> | <a href="#">tumor necrosis factor (ligand) superfamily, member 13 b</a><br><a href="#">tumor necrosis factor (ligand) superfamily, member 13 b</a> |
| <a href="#">chr19 + 17516494</a>  | 5.298 | <a href="#">ENST00000534306.1</a>                                      | <a href="#">CTD-2521M24.9</a>                        | <a href="#">CTD-2521M24.9</a>                                                                                                                      |
| <a href="#">chr1 + 158979680</a>  | 5.282 | <a href="#">ENST00000340979.6</a><br><a href="#">ENST00000368131.4</a> | <a href="#">IFI16</a><br><a href="#">IFI16</a>       | <a href="#">interferon, gamma-inducible protein 16</a><br><a href="#">interferon, gamma-inducible protein 16</a>                                   |
| <a href="#">chr14 - 69262916</a>  | 5.257 | <a href="#">ENST00000553375.1</a>                                      | <a href="#">ZFP36L1</a>                              | <a href="#">ZFP36 ring finger protein-like 1</a>                                                                                                   |
| <a href="#">chr19 - 50400125</a>  | 5.245 | <a href="#">ENST00000593956.1</a>                                      | <a href="#">IL411</a>                                | <a href="#">interleukin 4 induced 1</a>                                                                                                            |
| <a href="#">chr1 + 110453608</a>  | 5.239 | <a href="#">ENST00000369801.1</a>                                      | <a href="#">CSF1</a>                                 | <a href="#">colony stimulating factor 1 (macrophage)</a>                                                                                           |
| <a href="#">chr16 + 10972818</a>  | 5.164 | <a href="#">ENST00000576601.1</a>                                      | <a href="#">CIITA</a>                                | <a href="#">class II, major histocompatibility complex, transactivator</a>                                                                         |
| <a href="#">chr20 - 47894936</a>  | 5.099 | <a href="#">ENST00000371754.4</a>                                      | <a href="#">ZNF1</a>                                 | <a href="#">zinc finger, NFX1-type containing 1</a>                                                                                                |

**ISMARA****Project**

Final-1

**Navigation**

All motifs sorted by activity significance

All samples sorted alphabetically

Mean activities

**Downloads**

Activities table

Activity deltas table

Regulatory interactions

Motifs sorted by significance (text)

Download the whole report

Activity graph

Z-values graph

Top targets

GO analysis

Back to top

|                                   |       |                                                                                                                                                                                       |                                                  |                                                                                                                              |
|-----------------------------------|-------|---------------------------------------------------------------------------------------------------------------------------------------------------------------------------------------|--------------------------------------------------|------------------------------------------------------------------------------------------------------------------------------|
| <a href="#">chr3_+_48507210</a>   | 5.028 | <a href="#">ENST00000444177.1</a><br><a href="#">ENST00000433541.1</a><br><a href="#">ENST00000422277.2</a><br><a href="#">ENST00000436480.2</a>                                      | <a href="#">TREX1</a><br><a href="#">TREX1</a>   | <a href="#">three prime repair exonuclease 1</a><br><a href="#">three prime repair exonuclease 1</a>                         |
| <a href="#">chr2_+_231280954</a>  | 4.876 | <a href="#">ENST00000341950.4</a><br><a href="#">ENST00000409824.1</a><br><a href="#">ENST00000409341.1</a><br><a href="#">ENST00000409112.1</a><br><a href="#">ENST00000340126.4</a> | <a href="#">SP100</a><br><a href="#">SP100</a>   | <a href="#">SP100 nuclear antigen</a><br><a href="#">SP100 nuclear antigen</a>                                               |
| <a href="#">chr4_+_87928140</a>   | 4.852 | <a href="#">ENST00000307808.6</a>                                                                                                                                                     | <a href="#">AFF1</a>                             | <a href="#">AF4/FMR2 family member 1</a>                                                                                     |
| <a href="#">chr1_+_113217073</a>  | 4.838 | <a href="#">ENST00000369645.1</a>                                                                                                                                                     | <a href="#">MOV10</a>                            | <a href="#">Mov10, Moloney leukemia virus 10, homolog (mouse)</a>                                                            |
| <a href="#">chr2_+_231280908</a>  | 4.828 | <a href="#">ENST00000432979.1</a><br><a href="#">ENST00000427101.2</a>                                                                                                                | <a href="#">SP100</a><br><a href="#">SP100</a>   | <a href="#">SP100 nuclear antigen</a><br><a href="#">SP100 nuclear antigen</a>                                               |
| <a href="#">chr14_-_67955426</a>  | 4.828 | <a href="#">ENST00000554480.1</a>                                                                                                                                                     | <a href="#">TMEM229B</a>                         | <a href="#">transmembrane protein 229 B</a>                                                                                  |
| <a href="#">chr17_-_54991369</a>  | 4.825 | <a href="#">ENST00000537230.1</a>                                                                                                                                                     | <a href="#">TRIM25</a>                           | <a href="#">tripartite motif containing 25</a>                                                                               |
| <a href="#">chr11_-_104916034</a> | 4.811 | <a href="#">ENST00000375704.3</a><br><a href="#">ENST00000528513.1</a><br><a href="#">ENST00000375706.2</a>                                                                           | <a href="#">CARD16</a><br><a href="#">CARD16</a> | <a href="#">caspase recruitment domain family, member 16</a><br><a href="#">caspase recruitment domain family, member 16</a> |
| <a href="#">chr1_+_113217345</a>  | 4.802 | <a href="#">ENST00000357443.2</a>                                                                                                                                                     | <a href="#">MOV10</a>                            | <a href="#">Mov10, Moloney leukemia virus 10, homolog (mouse)</a>                                                            |
| <a href="#">chr6_-_32806506</a>   | 4.799 | <a href="#">ENST00000374897.2</a><br><a href="#">ENST00000452392.2</a>                                                                                                                | <a href="#">TAP2</a><br><a href="#">TAP2</a>     | <a href="#">transporter 2, ATP-binding cassette, sub-family B (MDR/TAP)</a><br><a href="#">Uncharacterized protein</a>       |
| <a href="#">chr1_+_113217043</a>  | 4.774 | <a href="#">ENST00000413052.2</a>                                                                                                                                                     | <a href="#">MOV10</a>                            | <a href="#">Mov10, Moloney leukemia virus 10, homolog (mouse)</a>                                                            |
| <a href="#">chr14_+_35451880</a>  | 4.773 | <a href="#">ENST00000555746.1</a><br><a href="#">ENST00000554803.1</a>                                                                                                                | <a href="#">SRP54</a><br><a href="#">SRP54</a>   | <a href="#">signal recognition particle 54kDa</a>                                                                            |

**ISMARA****Project**

Final-1

**Navigation**

All motifs sorted by activity significance

All samples sorted alphabetically

Mean activities

**Downloads**

Activities table

Activity deltas table

Regulatory interactions

Motifs sorted by significance (text)

Download the whole report

Activity graph

Z-values graph

Top targets

GO analysis

Back to top

|                                  |       |                                                                                                                                                                                       |                                                        |                                                                                                                                                          |
|----------------------------------|-------|---------------------------------------------------------------------------------------------------------------------------------------------------------------------------------------|--------------------------------------------------------|----------------------------------------------------------------------------------------------------------------------------------------------------------|
|                                  |       |                                                                                                                                                                                       |                                                        | <a href="#">signal recognition particle 5 4kDa</a>                                                                                                       |
| <a href="#">chr7_+_18535321</a>  | 4.741 | <a href="#">ENST00000413380.1</a><br><a href="#">ENST00000430454.1</a>                                                                                                                | <a href="#">HDAC9</a><br><a href="#">HDAC9</a>         | <a href="#">histone deacetylase 9</a><br><a href="#">histone deacetylase 9</a>                                                                           |
| <a href="#">chr1_-_150693318</a> | 4.665 | <a href="#">ENST00000442853.1</a><br><a href="#">ENST00000368995.4</a><br><a href="#">ENST00000368993.2</a><br><a href="#">ENST00000361824.2</a><br><a href="#">ENST00000322343.7</a> | <a href="#">HORMAD1</a><br><br><a href="#">HORMAD1</a> | <a href="#">HORMA domain containing 1</a><br><br><a href="#">HORMA domain containing 1</a>                                                               |
| <a href="#">chr2_+_85811525</a>  | 4.651 | <a href="#">ENST00000306384.4</a>                                                                                                                                                     | <a href="#">VAMP5</a>                                  | <a href="#">vesicle-associated membrane protein 5</a>                                                                                                    |
| <a href="#">chr15_+_89182156</a> | 4.649 | <a href="#">ENST00000379224.5</a>                                                                                                                                                     | <a href="#">ISG20</a>                                  | <a href="#">interferon stimulated exonuclease gene 20kDa</a>                                                                                             |
| <a href="#">chr6_+_32821924</a>  | 4.619 | <a href="#">ENST00000374859.2</a><br><a href="#">ENST00000453265.2</a>                                                                                                                | <a href="#">PSMB9</a><br><a href="#">PSMB9</a>         | <a href="#">proteasome (prosome, macrocatalytic) subunit, beta type, 9</a><br><a href="#">proteasome (prosome, macrocatalytic) subunit, beta type, 9</a> |
| <a href="#">chr3_-_146262352</a> | 4.556 | <a href="#">ENST00000462666.1</a>                                                                                                                                                     | <a href="#">PLSCR1</a>                                 | <a href="#">phospholipid scramblase 1</a>                                                                                                                |
| <a href="#">chr6_+_25963020</a>  | 4.518 | <a href="#">ENST00000357085.3</a>                                                                                                                                                     | <a href="#">TRIM38</a>                                 | <a href="#">tripartite motif containing 38</a>                                                                                                           |
| <a href="#">chrX_+_37639302</a>  | 4.490 | <a href="#">ENST00000545017.1</a><br><a href="#">ENST00000536160.1</a>                                                                                                                | <a href="#">CYBB</a><br><a href="#">CYBB</a>           | <a href="#">cytochrome b-245, beta polypeptide</a><br><a href="#">cytochrome b-245, beta polypeptide</a>                                                 |
| <a href="#">chr3_+_122283064</a> | 4.466 | <a href="#">ENST00000296161.4</a>                                                                                                                                                     | <a href="#">DTX3L</a>                                  | <a href="#">deltex 3-like (Drosophila)</a>                                                                                                               |
| <a href="#">chr3_-_146262428</a> | 4.422 | <a href="#">ENST00000486631.1</a>                                                                                                                                                     | <a href="#">PLSCR1</a>                                 | <a href="#">phospholipid scramblase 1</a>                                                                                                                |
| <a href="#">chr19_-_17516449</a> | 4.420 | <a href="#">ENST00000252593.6</a>                                                                                                                                                     | <a href="#">BST2</a>                                   | <a href="#">bone marrow stromal cell antigen 2</a>                                                                                                       |
| <a href="#">chr9_+_26746951</a>  | 4.411 | <a href="#">ENST00000523363.1</a>                                                                                                                                                     | <a href="#">RP11-18A15.1</a>                           | <a href="#">RP11-18A15.1</a>                                                                                                                             |
| <a href="#">chr1_+_113217309</a> | 4.367 | <a href="#">ENST00000369644.1</a><br><a href="#">ENST00000544796.1</a>                                                                                                                | <a href="#">MOV10</a><br><a href="#">MOV10</a>         | <a href="#">Mov10, Moloney leukemia virus 10, homolog (mouse)</a><br><a href="#">Mov10, Moloney leukemia virus 10, homolog (mouse)</a>                   |

**ISMARA****Project**

Final-1

**Navigation**

All motifs sorted by activity significance

All samples sorted alphabetically

Mean activities

**Downloads**

Activities table

Activity deltas table

Regulatory interactions

Motifs sorted by significance (text)

Download the whole report

Activity graph

Z-values graph

Top targets

GO analysis

Back to top

|                                   |       |                                                                                                                                                                                                                                                                                                                                                                                                                     |                                                  |                                                                                                                                                                                                                              |
|-----------------------------------|-------|---------------------------------------------------------------------------------------------------------------------------------------------------------------------------------------------------------------------------------------------------------------------------------------------------------------------------------------------------------------------------------------------------------------------|--------------------------------------------------|------------------------------------------------------------------------------------------------------------------------------------------------------------------------------------------------------------------------------|
| <a href="#">chr12_-_118498911</a> | 4.337 | <a href="#">ENST00000544233.1</a>                                                                                                                                                                                                                                                                                                                                                                                   | <a href="#">WSB2</a>                             | <a href="#">WD repeat and SOCS box containing 2</a>                                                                                                                                                                          |
| <a href="#">chr4_+_100737954</a>  | 4.286 | <a href="#">ENST00000296414.7</a><br><a href="#">ENST00000512369.1</a>                                                                                                                                                                                                                                                                                                                                              | <a href="#">DAPP1</a><br><a href="#">DAPP1</a>   | <a href="#">dual adaptor of phosphotyrosine and 3-phosphoinositides</a><br><a href="#">dual adaptor of phosphotyrosine and 3-phosphoinositides</a>                                                                           |
| <a href="#">chr3_-_28390581</a>   | 4.271 | <a href="#">ENST00000479665.1</a>                                                                                                                                                                                                                                                                                                                                                                                   | <a href="#">AZI2</a>                             | <a href="#">5-azacytidine induced 2</a>                                                                                                                                                                                      |
| <a href="#">chr11_-_104905840</a> | 4.230 | <a href="#">ENST00000436863.3</a><br><a href="#">ENST00000526568.1</a><br><a href="#">ENST00000393136.4</a><br><a href="#">ENST00000531166.1</a><br><a href="#">ENST00000534497.1</a><br><a href="#">ENST00000527979.1</a><br><a href="#">ENST00000446369.1</a><br><a href="#">ENST00000353247.5</a><br><a href="#">ENST00000528974.1</a><br><a href="#">ENST00000533400.1</a><br><a href="#">ENST00000525825.1</a> | <a href="#">CASP1</a><br><a href="#">CASP1</a>   | <a href="#">caspase 1, apoptosis-related cysteine peptidase</a><br><a href="#">caspase 1, apoptosis-related cysteine peptidase</a>                                                                                           |
| <a href="#">chr8_+_27184320</a>   | 4.218 | <a href="#">ENST00000522517.1</a>                                                                                                                                                                                                                                                                                                                                                                                   | <a href="#">PTK2B</a>                            | <a href="#">protein tyrosine kinase 2 beta</a>                                                                                                                                                                               |
| <a href="#">chr2_-_166651152</a>  | 4.198 | <a href="#">ENST00000412248.1</a><br><a href="#">ENST00000431484.1</a>                                                                                                                                                                                                                                                                                                                                              | <a href="#">GALNT3</a><br><a href="#">GALNT3</a> | <a href="#">UDP-N-acetyl-alpha-D-galactosamine:polypeptide N-acetylglucosaminyltransferase 3 (GalNAc-T3)</a><br><a href="#">UDP-N-acetyl-alpha-D-galactosamine:polypeptide N-acetylglucosaminyltransferase 3 (GalNAc-T3)</a> |
| <a href="#">chr11_-_104972158</a> | 4.141 | <a href="#">ENST00000598974.1</a><br><a href="#">ENST00000593315.1</a><br><a href="#">ENST00000594519.1</a><br><a href="#">ENST00000415981.2</a>                                                                                                                                                                                                                                                                    | <a href="#">CASP1</a>                            | <a href="#">caspase 1, apoptosis-related cysteine peptidase</a><br><br><a href="#">caspase recruitment domain</a>                                                                                                            |

**ISMARA****Project**

Final-1

**Navigation**

All motifs sorted by activity significance

All samples sorted alphabetically

Mean activities

**Downloads**

Activities table

Activity deltas table

Regulatory interactions

Motifs sorted by significance (text)

Download the whole report

Activity graph

Z-values graph

Top targets

GO analysis

Back to top

|                                  |       |                                                                                                                                                  |                                                         |                                                                                                     |
|----------------------------------|-------|--------------------------------------------------------------------------------------------------------------------------------------------------|---------------------------------------------------------|-----------------------------------------------------------------------------------------------------|
|                                  |       | <a href="#">ENST00000525374.1</a><br><a href="#">ENST00000375707.1</a>                                                                           | <a href="#">CARD16</a><br><a href="#">CARD17</a>        | <a href="#">n family, member 16</a><br><a href="#">caspase recruitment domain family, member 17</a> |
| <a href="#">chr8_+_144640499</a> | 4.128 | <a href="#">ENST00000534018.1</a><br><a href="#">ENST00000525721.1</a>                                                                           | <a href="#">GSDMD</a><br><a href="#">GSDMD</a>          | <a href="#">gasdermin D</a><br><a href="#">gasdermin D</a>                                          |
| <a href="#">chr3_-_28390120</a>  | 4.128 | <a href="#">ENST00000334100.6</a>                                                                                                                | <a href="#">AZI2</a>                                    | <a href="#">5-azacytidine induced 2</a>                                                             |
| <a href="#">chr19_+_17516909</a> | 4.108 | <a href="#">ENST00000600514.1</a><br><a href="#">ENST00000601007.1</a><br><a href="#">ENST00000594913.1</a><br><a href="#">ENST00000599975.1</a> | <a href="#">MVB12A</a><br><a href="#">CTD-2521M24.9</a> | <a href="#">multivesicular body subunit 12A</a><br><a href="#">CTD-2521M24.9</a>                    |
| <a href="#">chr15_+_89182178</a> | 4.101 | <a href="#">ENST00000559876.1</a>                                                                                                                | <a href="#">ISG20</a>                                   | <a href="#">interferon stimulated exonuclease gene 20kDa</a>                                        |
| <a href="#">chr10_+_92980517</a> | 4.077 | <a href="#">ENST00000336126.5</a>                                                                                                                | <a href="#">PCGF5</a>                                   | <a href="#">polycomb group ring finger 5</a>                                                        |
| <a href="#">chr1_+_110453462</a> | 4.041 | <a href="#">ENST00000488198.1</a>                                                                                                                | <a href="#">CSF1</a>                                    | <a href="#">colony stimulating factor 1 (macrophage)</a>                                            |
| <a href="#">chr10_-_9801179</a>  | 4.023 | <a href="#">ENST00000419836.1</a>                                                                                                                | <a href="#">RP5-1051H14.2</a>                           | <a href="#">RP5-1051H14.2</a>                                                                       |
| <a href="#">chr9_-_80437915</a>  | 4.005 | <a href="#">ENST00000397476.3</a>                                                                                                                | <a href="#">GNAQ</a>                                    | <a href="#">guanine nucleotide binding protein (G protein), q polypeptide</a>                       |
| <a href="#">chr2_-_231084659</a> | 3.978 | <a href="#">ENST00000392048.3</a><br><a href="#">ENST00000258381.6</a><br><a href="#">ENST00000358662.4</a><br><a href="#">ENST00000455674.1</a> | <a href="#">SP110</a><br><a href="#">SP110</a>          | <a href="#">SP110 nuclear body protein</a><br><a href="#">SP110 nuclear body protein</a>            |
| <a href="#">chr11_-_4629367</a>  | 3.972 | <a href="#">ENST00000533021.1</a>                                                                                                                | <a href="#">TRIM68</a>                                  | <a href="#">tripartite motif containing 68</a>                                                      |
| <a href="#">chr3_-_146262637</a> | 3.966 | <a href="#">ENST00000472349.1</a><br><a href="#">ENST00000342435.4</a>                                                                           | <a href="#">PLSCR1</a><br><a href="#">PLSCR1</a>        | <a href="#">phospholipid scramblase 1</a><br><a href="#">phospholipid scramblase 1</a>              |
| <a href="#">chr5_-_39203093</a>  | 3.946 | <a href="#">ENST00000515010.1</a>                                                                                                                | <a href="#">FYB</a>                                     | <a href="#">FYN binding protein</a>                                                                 |
| <a href="#">chr13_+_50070491</a> | 3.943 | <a href="#">ENST00000442195.1</a><br><a href="#">ENST00000496612.1</a><br><a href="#">ENST00000357596.3</a><br><a href="#">ENST00000485919.1</a> | <a href="#">PHF11</a><br><a href="#">PHF11</a>          | <a href="#">PHD finger protein 11</a><br><a href="#">PHD finger protein 11</a>                      |
| <a href="#">chr3_-_146262488</a> | 3.918 | <a href="#">ENST00000487389.1</a>                                                                                                                | <a href="#">PLSCR1</a>                                  | <a href="#">phospholipid scramblase 1</a>                                                           |

**ISMARA****Project**

Final-1

**Navigation**

All motifs sorted by activity significance

All samples sorted alphabetically

Mean activities

**Downloads**

Activities table

Activity deltas table

Regulatory interactions

Motifs sorted by significance (text)

Download the whole report

Activity graph

Z-values graph

Top targets

GO analysis

Back to top

|                                  |       |                                                                                                                                                                                                                            |                                                                                 |                                                                                                                                                                               |
|----------------------------------|-------|----------------------------------------------------------------------------------------------------------------------------------------------------------------------------------------------------------------------------|---------------------------------------------------------------------------------|-------------------------------------------------------------------------------------------------------------------------------------------------------------------------------|
| <a href="#">chr7 + 134832808</a> | 3.895 | <a href="#">ENST00000275767.3</a>                                                                                                                                                                                          | <a href="#">TMEM140</a>                                                         | <a href="#">transmembrane protein 140</a>                                                                                                                                     |
| <a href="#">chr6 - 109702885</a> | 3.878 | <a href="#">ENST00000504373.1</a>                                                                                                                                                                                          | <a href="#">CD164</a>                                                           | <a href="#">CD164 molecule, sialomucin</a>                                                                                                                                    |
| <a href="#">chr2 - 145275828</a> | 3.859 | <a href="#">ENST00000409211.1</a><br><a href="#">ENST00000392861.2</a>                                                                                                                                                     | <a href="#">ZEB2</a><br><a href="#">ZEB2</a>                                    | <a href="#">zinc finger E-box binding homeobox 2</a><br><a href="#">zinc finger E-box binding homeobox 2</a>                                                                  |
| <a href="#">chrX - 30595959</a>  | 3.859 | <a href="#">ENST00000378962.3</a>                                                                                                                                                                                          | <a href="#">CXorf21</a>                                                         | <a href="#">chromosome X open reading frame 21</a>                                                                                                                            |
| <a href="#">chr2 - 231084820</a> | 3.846 | <a href="#">ENST00000338556.3</a><br><a href="#">ENST00000258382.5</a>                                                                                                                                                     | <a href="#">SP110</a><br><a href="#">SP110</a>                                  | <a href="#">SP110 nuclear body protein</a><br><a href="#">SP110 nuclear body protein</a>                                                                                      |
| <a href="#">chr3 - 146262365</a> | 3.845 | <a href="#">ENST00000448787.2</a>                                                                                                                                                                                          | <a href="#">PLSCR1</a>                                                          | <a href="#">phospholipid scramblase 1</a>                                                                                                                                     |
| <a href="#">chr6 + 32811885</a>  | 3.788 | <a href="#">ENST00000458296.1</a><br><a href="#">ENST00000413039.1</a><br><a href="#">ENST00000429600.1</a><br><a href="#">ENST00000412095.1</a><br><a href="#">ENST00000415067.1</a><br><a href="#">ENST00000395330.1</a> | <a href="#">TAPSAR1</a><br><br><a href="#">TAPSAR1</a><br><a href="#">PSMB9</a> | <a href="#">TAP1 and PSMB8 antisense RNA 1</a><br><br><a href="#">TAP1 and PSMB8 antisense RNA 1</a><br><a href="#">proteasome (prosome, macropain) subunit, beta type, 9</a> |
| <a href="#">chr5 - 95158375</a>  | 3.785 | <a href="#">ENST00000512469.2</a><br><a href="#">ENST00000379979.4</a><br><a href="#">ENST00000505427.1</a><br><a href="#">ENST00000508780.1</a>                                                                           | <a href="#">GLRX</a><br><br><a href="#">GLRX</a>                                | <a href="#">glutaredoxin (thioltransferase)</a><br><br><a href="#">glutaredoxin (thioltransferase)</a>                                                                        |
| <a href="#">chr16 + 57023406</a> | 3.762 | <a href="#">ENST00000436936.1</a><br><a href="#">ENST00000262510.6</a><br><a href="#">ENST00000308149.7</a>                                                                                                                | <a href="#">NLRC5</a><br><a href="#">NLRC5</a>                                  | <a href="#">NLR family, CARD domain containing 5</a><br><a href="#">NLR family, CARD domain containing 5</a>                                                                  |
| <a href="#">chr2 + 33701707</a>  | 3.758 | <a href="#">ENST00000423159.1</a><br><a href="#">ENST00000425210.1</a>                                                                                                                                                     | <a href="#">RASGRP3</a><br><a href="#">RASGRP3</a>                              | <a href="#">RAS guanyl releasing protein 3 (calcium and DAG-regulated)</a><br><a href="#">RAS guanyl releasing prote</a>                                                      |

**ISMARA****Project**

Final-1

**Navigation**

All motifs sorted by activity significance

All samples sorted alphabetically

Mean activities

**Downloads**

Activities table

Activity deltas table

Regulatory interactions

Motifs sorted by significance (text)

Download the whole report

|                                  |       |                                                                                                                                                                                                                                                                                                      |                                                             |                                                                                                        |
|----------------------------------|-------|------------------------------------------------------------------------------------------------------------------------------------------------------------------------------------------------------------------------------------------------------------------------------------------------------|-------------------------------------------------------------|--------------------------------------------------------------------------------------------------------|
|                                  |       | <a href="#">ENST00000444784.1</a>                                                                                                                                                                                                                                                                    |                                                             | <a href="#">in 3 (calcium and DAG-regulated)</a>                                                       |
| <a href="#">chr19 - 50400212</a> | 3.749 | <a href="#">ENST00000391826.2</a>                                                                                                                                                                                                                                                                    | <a href="#">IL411</a>                                       | <a href="#">interleukin 4 induced 1</a>                                                                |
| <a href="#">chr19 + 17516531</a> | 3.701 | <a href="#">ENST00000528911.1</a><br><a href="#">ENST00000528604.1</a><br><a href="#">ENST00000595892.1</a><br><a href="#">ENST00000500836.2</a><br><a href="#">ENST00000598546.1</a><br><a href="#">ENST00000600369.1</a><br><a href="#">ENST00000598356.1</a><br><a href="#">ENST00000594426.1</a> | <a href="#">MVB12A</a><br><br><a href="#">CTD-2521M24.9</a> | <a href="#">multivesicular body subunit 12A</a><br><br><a href="#">CTD-2521M24.9</a>                   |
| <a href="#">chr6 - 36355486</a>  | 3.624 | <a href="#">ENST00000538992.1</a>                                                                                                                                                                                                                                                                    | <a href="#">ETV7</a>                                        | <a href="#">ets variant 7</a>                                                                          |
| <a href="#">chr13 + 50070077</a> | 3.601 | <a href="#">ENST00000426879.1</a><br><a href="#">ENST00000378319.3</a>                                                                                                                                                                                                                               | <a href="#">PHF11</a><br><a href="#">PHF11</a>              | <a href="#">PHD finger protein 11</a><br><a href="#">PHD finger protein 11</a>                         |
| <a href="#">chr14 - 67981870</a> | 3.573 | <a href="#">ENST00000555994.1</a>                                                                                                                                                                                                                                                                    | <a href="#">TMEM229B</a>                                    | <a href="#">transmembrane protein 229 B</a>                                                            |
| <a href="#">chr6 - 36355513</a>  | 3.569 | <a href="#">ENST00000373737.4</a><br><a href="#">ENST00000340181.4</a>                                                                                                                                                                                                                               | <a href="#">ETV7</a><br><a href="#">ETV7</a>                | <a href="#">ets variant 7</a><br><a href="#">ets variant 7</a>                                         |
| <a href="#">chr15 + 89181974</a> | 3.557 | <a href="#">ENST00000306072.5</a>                                                                                                                                                                                                                                                                    | <a href="#">ISG20</a>                                       | <a href="#">interferon stimulated exonu<br/>lease gene 20kDa</a>                                       |
| <a href="#">chr7 + 150382781</a> | 3.555 | <a href="#">ENST00000474605.1</a><br><a href="#">ENST00000223293.5</a>                                                                                                                                                                                                                               | <a href="#">GIMAP2</a><br><a href="#">GIMAP2</a>            | <a href="#">GTPase, IMAP family mem<br/>ber 2</a><br><a href="#">GTPase, IMAP family mem<br/>ber 2</a> |

**Gene Ontology Analysis**

Activity graph

Z-values graph

Top targets

GO analysis

Back to top

**Gene overrepresentation in biological\_process category:**

Search:

Show  entries

Showing 1 to 20 of 209 entries



**ISMARA****Project**

Final-1

**Navigation**[All motifs sorted by activity significance](#)[All samples sorted alphabetically](#)[Mean activities](#)**Downloads**[Activities table](#)[Activity deltas table](#)[Regulatory interactions](#)[Motifs sorted by significance \(text\)](#)[Download the whole report](#)

| Log-likelihood per target | Total log-likelihood | Term                       | Description                                                                   |
|---------------------------|----------------------|----------------------------|-------------------------------------------------------------------------------|
| 5.3                       | 628.3                | <a href="#">GO:0071357</a> | type I interferon signaling pathway(GO:0071357)                               |
| 1.1                       | 131.0                | <a href="#">GO:0051607</a> | defense response to virus(GO:0051607)                                         |
| 0.1                       | 117.2                | <a href="#">GO:0006955</a> | immune response(GO:0006955)                                                   |
| 1.1                       | 73.2                 | <a href="#">GO:0032480</a> | negative regulation of type I interferon signaling pathway(GO:0032480)        |
| 1.1                       | 51.0                 | <a href="#">GO:0042130</a> | negative regulation of T cell proliferation(GO:0042130)                       |
| 11.0                      | 44.1                 | <a href="#">GO:0051097</a> | negative regulation of helicase activity(GO:0051097)                          |
| 0.1                       | 38.2                 | <a href="#">GO:0007249</a> | I-kappaB kinase/NF-kappaB signaling(GO:0007249)                               |
| 9.5                       | 38.1                 | <a href="#">GO:0009138</a> | pyrimidine nucleoside diphosphate metabolism(GO:0009138)                      |
| 0.2                       | 36.8                 | <a href="#">GO:0042787</a> | protein ubiquitination involved in ubiquitin-mediated proteolysis(GO:0042787) |
| 2.4                       | 29.2                 | <a href="#">GO:0002230</a> | positive regulation of defense response(GO:0002230)                           |
| 0.2                       | 29.0                 | <a href="#">GO:0009615</a> | response to virus(GO:0009615)                                                 |
| 0.6                       | 26.3                 | <a href="#">GO:0060135</a> | maternal process involved in female pronuclear migration(GO:0060135)          |
| 4.1                       | 24.3                 | <a href="#">GO:0006436</a> | tryptophanyl-tRNA aminoacylation(GO:0006436)                                  |
| 1.9                       | 24.2                 | <a href="#">GO:0017121</a> | phospholipid scrambling(GO:0017121)                                           |
| 7.3                       | 22.0                 | <a href="#">GO:0032938</a> | negative regulation of translation in response to stress(GO:0032938)          |
| 0.3                       | 20.8                 | <a href="#">GO:0060333</a> | interferon-gamma-mediated signaling pathway(GO:0060333)                       |
| 0.1                       | 20.4                 | <a href="#">GO:0007281</a> | germ cell development(GO:0007281)                                             |
| 0.5                       | 19.1                 | <a href="#">GO:0070206</a> | protein trimerization(GO:0070206)                                             |
| 4.7                       | 19.0                 | <a href="#">GO:0046967</a> | cytosol to ER transport(GO:0046967)                                           |
| 4.7                       | 18.8                 | <a href="#">GO:0035279</a> | mRNA cleavage involved in gene silencing by microRNAs(GO:0035279)             |

**Gene overrepresentation in cellular\_component category:**Search: Show  entries

Showing 1 to 20 of 86 entries

| Log-likelihood per target | Total log-likelihood | Term                       | Description                    |
|---------------------------|----------------------|----------------------------|--------------------------------|
| 0.1                       | 289.0                | <a href="#">GO:0005829</a> | cytosol(GO:0005829)            |
| 0.0                       | 239.2                | <a href="#">GO:0005575</a> | cellular_component(GO:0005575) |
| 0.0                       | 168.0                | <a href="#">GO:0005737</a> | cytoplasm(GO:0005737)          |

[Activity graph](#)[Z-values graph](#)[Top targets](#)[GO analysis](#)[Back to top](#)

**ISMARA****Project**

Final-1

**Navigation**[All motifs sorted by activity significance](#)[All samples sorted alphabetically](#)[Mean activities](#)**Downloads**[Activities table](#)[Activity deltas table](#)[Regulatory interactions](#)[Motifs sorted by significance \(text\)](#)[Download the whole report](#)

|     |       |                            |                                       |
|-----|-------|----------------------------|---------------------------------------|
| 0.4 | 162.1 | <a href="#">GO:0005792</a> | obsolete microsome(GO:0005792)        |
| 0.1 | 152.8 | <a href="#">GO:0005739</a> | mitochondrion(GO:0005739)             |
| 0.2 | 135.8 | <a href="#">GO:0005789</a> | endoplasmic reticulum membrane(GO:    |
| 0.1 | 58.5  | <a href="#">GO:0010008</a> | endosome membrane(GO:0010008)         |
| 0.1 | 53.0  | <a href="#">GO:0048471</a> | perinuclear region of cytoplasm(GO:00 |
| 0.0 | 52.7  | <a href="#">GO:0005730</a> | nucleolus(GO:0005730)                 |
| 0.0 | 27.8  | <a href="#">GO:0005615</a> | extracellular space(GO:0005615)       |
| 2.6 | 23.8  | <a href="#">GO:0042825</a> | TAP complex(GO:0042825)               |
| 0.5 | 22.3  | <a href="#">GO:0012505</a> | endomembrane system(GO:0012505)       |
| 7.3 | 22.0  | <a href="#">GO:0042406</a> | extrinsic component of endoplasmic re |
| 0.2 | 21.7  | <a href="#">GO:0016605</a> | PML body(GO:0016605)                  |
| 1.7 | 21.5  | <a href="#">GO:0033391</a> | chromatoid body(GO:0033391)           |
| 0.3 | 19.8  | <a href="#">GO:0015030</a> | Cajal body(GO:0015030)                |
| 0.3 | 19.2  | <a href="#">GO:0000932</a> | cytoplasmic mRNA processing body(G    |
| 0.1 | 16.6  | <a href="#">GO:0016363</a> | nuclear matrix(GO:0016363)            |
| 0.1 | 16.5  | <a href="#">GO:0009897</a> | external side of plasma membrane(GO   |
| 1.6 | 14.3  | <a href="#">GO:0008074</a> | guanylate cyclase complex, soluble(GC |

**Gene overrepresentation in molecular\_function category:**Search: Show  entries

Showing 1 to 20 of 182 entries

| Log-likelihood per target | Total log-likelihood | Term                       | Description                                      |
|---------------------------|----------------------|----------------------------|--------------------------------------------------|
| 0.9                       | 163.3                | <a href="#">GO:0016779</a> | nucleotidyltransferase activity(GO:0016779)      |
| 0.6                       | 134.1                | <a href="#">GO:0004386</a> | helicase activity(GO:0004386)                    |
| 1.5                       | 122.4                | <a href="#">GO:0051536</a> | iron-sulfur cluster binding(GO:0051536)          |
| 0.2                       | 97.4                 | <a href="#">GO:0003924</a> | GTPase activity(GO:0003924)                      |
| 0.0                       | 92.1                 | <a href="#">GO:0008270</a> | zinc ion binding(GO:0008270)                     |
| 0.4                       | 79.5                 | <a href="#">GO:0016881</a> | acid-amino acid ligase activity(GO:0016881)      |
| 1.6                       | 73.3                 | <a href="#">GO:0003950</a> | NAD+ ADP-ribosyltransferase activity(GO:0003950) |

[Activity graph](#)[Z-values graph](#)[Top targets](#)[GO analysis](#)[Back to top](#)

**ISMARA****Project**

Final-1

**Navigation**[All motifs sorted by activity significance](#)[All samples sorted alphabetically](#)[Mean activities](#)**Downloads**[Activities table](#)[Activity deltas table](#)[Regulatory interactions](#)[Motifs sorted by significance \(text\)](#)[Download the whole report](#)[Activity graph](#)[Z-values graph](#)[Top targets](#)[GO analysis](#)[Back to top](#)

|      |      |                            |                                           |
|------|------|----------------------------|-------------------------------------------|
| 0.6  | 40.8 | <a href="#">GO:0036459</a> | thiol-dependent ubiquitin-specific prote  |
| 13.4 | 40.1 | <a href="#">GO:0031386</a> | protein tag(GO:0031386)                   |
| 5.4  | 38.1 | <a href="#">GO:0004127</a> | cytidylate kinase activity(GO:0004127)    |
| 0.3  | 31.2 | <a href="#">GO:0003704</a> | obsolete specific RNA polymerase II tra   |
| 0.1  | 29.6 | <a href="#">GO:0043565</a> | sequence-specific DNA binding(GO:00       |
| 5.7  | 28.6 | <a href="#">GO:0003726</a> | double-stranded RNA adenosine deam        |
| 1.4  | 25.6 | <a href="#">GO:0008035</a> | high-density lipoprotein particle binding |
| 0.1  | 24.7 | <a href="#">GO:0003714</a> | transcription corepressor activity(GO:00  |
| 4.1  | 24.3 | <a href="#">GO:0004830</a> | tryptophan-tRNA ligase activity(GO:000    |
| 1.9  | 24.2 | <a href="#">GO:0017128</a> | phospholipid scramblase activity(GO:00    |
| 0.0  | 23.5 | <a href="#">GO:0004872</a> | receptor activity(GO:0004872) molecu      |
| 0.5  | 22.5 | <a href="#">GO:0008603</a> | cAMP-dependent protein kinase regula      |
| 5.5  | 22.0 | <a href="#">GO:0032183</a> | SUMO binding(GO:0032183)                  |

**Gene overrepresentation in C2:CP category:**Search: Show  entries

Showing 1 to 18 of 18 entries

| Log-likelihood per target | Total log-likelihood | Term                                                   |
|---------------------------|----------------------|--------------------------------------------------------|
| 2.4                       | 28.3                 | <a href="#">ST_INTERFERON_GAMMA_PATHWAY</a>            |
| 0.1                       | 23.3                 | <a href="#">SIG_PIP3_SIGNALING_IN_CARDIAC_MYOCYTES</a> |
| 0.6                       | 21.6                 | <a href="#">SA_MMP_CYTOKINE_CONNECTION</a>             |
| 0.4                       | 11.8                 | <a href="#">SIG_PIP3_SIGNALING_IN_B_LYMPHOCYTES</a>    |
| 0.3                       | 10.5                 | <a href="#">SA_FAS_SIGNALING</a>                       |
| 0.4                       | 7.0                  | <a href="#">SIG_IL4RECEPTOR_IN_B_LYMPHOCYTES</a>       |
| 0.3                       | 6.7                  | <a href="#">ST_INTERLEUKIN_4_PATHWAY</a>               |
| 0.2                       | 5.7                  | <a href="#">SA_CASPASE_CASCADE</a>                     |
| 0.7                       | 5.2                  | <a href="#">ST_TYPE_I_INTERFERON_PATHWAY</a>           |
| 0.3                       | 4.4                  | <a href="#">SA_PTEN_PATHWAY</a>                        |
| 0.3                       | 3.4                  | <a href="#">ST_PAC1_RECEPTOR_PATHWAY</a>               |

**ISMARA****Project**

Final-1

**Navigation**[All motifs sorted by activity significance](#)[All samples sorted alphabetically](#)[Mean activities](#)**Downloads**[Activities table](#)[Activity deltas table](#)[Regulatory interactions](#)[Motifs sorted by significance \(text\)](#)[Download the whole report](#)

|     |     |                                                         |
|-----|-----|---------------------------------------------------------|
| 0.1 | 2.5 | <a href="#">ST_ADRENERGIC</a>                           |
| 0.0 | 1.8 | <a href="#">SIG_REGULATION_OF_THE_ACTIN_CYTOSKELET</a>  |
| 0.0 | 1.6 | <a href="#">ST_WNT_BETA_CATENIN_PATHWAY</a>             |
| 0.0 | 0.8 | <a href="#">ST_P38_MAPK_PATHWAY</a>                     |
| 0.1 | 0.7 | <a href="#">ST_JAK_STAT_PATHWAY</a>                     |
| 0.0 | 0.6 | <a href="#">SIG_INSULIN_RECEPTOR_PATHWAY_IN_CARDIAC</a> |
| 0.0 | 0.3 | <a href="#">SA_PROGRAMMED_CELL_DEATH</a>                |

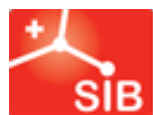

Swiss Institute of  
Bioinformatics

**BIOZENTRUM**

Universität Basel  
The Center for  
Molecular Life Sciences

van Nimwegen Lab

[Activity graph](#)[Z-values graph](#)[Top targets](#)[GO analysis](#)[Back to top](#)
